1 **Whole-exome sequencing identified rare variants associated with**  
2 **body length and girth in cattle**

3

4 Yan Chen<sup>a,b,1</sup>, Min Du<sup>b</sup>, Yining Liu<sup>c</sup>, Xue Gao<sup>a</sup>, Wengang Zhang<sup>a</sup>, Ling Xu<sup>a</sup>, Lupei Zhang<sup>a</sup>,  
5 Huijiang Gao<sup>a</sup>, Lingyang Xu<sup>a</sup>, Bo Zhu<sup>a</sup>, Min Zhao<sup>d,1</sup>, Junya Li<sup>a,1</sup>

6

7 <sup>a</sup> Cattle Genetics and Breeding Team, Institute of Animal Science, Chinese Academy of  
8 Agricultural Science, Beijing, China

9 <sup>b</sup> Department of Animal Science, Washington State University, Pullman, USA

10 <sup>c</sup> The School of Public Health, Institute for Chemical Carcinogenesis, Guangzhou Medical  
11 University, Guangzhou, China

12 <sup>d</sup> School of Engineering, Faculty of Science, Health, Education and Engineering, University of the  
13 Sunshine Coast, Queensland, Australia.

14

15 **\*Corresponding authors.**

16 Junya Li, Institute of Animal Science (IAS), Chinese Academy of Agricultural Sciences (CAAS),  
17 No. 2 Yuanmingyuan West Road, Beijing, 100193, China. Phone: +86 010 62816065. Email:  
18 [lijunya@caas.cn](mailto:lijunya@caas.cn)

19

20 Min Zhao, Faculty of Science, Health, Education and Engineering, University of the Sunshine  
21 Coast, Bldg I, Rm 1.11B, ML 12. Phone: +61 (0)423791085. Email: [mzhao@usc.edu.au](mailto:mzhao@usc.edu.au)

22

23 Yan Chen, Institute of Animal Science (IAS), Chinese Academy of Agricultural Sciences (CAAS),  
24 No. 2 Yuanmingyuan West Road, Beijing, 100193, China. Phone: +86 010 62816065. Email:  
25 [chenyan0204@163.com](mailto:chenyan0204@163.com)

26

27

28 **Abstract**

29 Body measurements can be used in determining body size to monitor the cattle growth and  
30 examine the response to selection. Despite efforts putting into the identification of common  
31 genetic variants, the mechanism understanding of the rare variation in complex traits about body  
32 size and growth remains limited. Here, we firstly performed GWAS study for body measurement  
33 traits in Simmental cattle, however there were no SNPs exceeding significant level associated with  
34 body measurements. To further investigate the mechanism of growth traits in beef cattle, we  
35 conducted whole exome analysis of 20 cattle with phenotypic differences on body girth and length,  
36 representing the first systematic exploration of rare variants on body measurements in cattle. By  
37 carrying out a three-phase process of the variant calling and filtering, a sum of 1158, 1151, 1267,  
38 and 1303 rare variants were identified in four phenotypic groups of two growth traits, higher/  
39 lower body girth (BG\_H and BG\_L) and higher/lower body length (BL\_H and BL\_L) respectively.  
40 The subsequent functional enrichment analysis revealed that these rare variants distributed in 886  
41 genes associated with collagen formation and organelle organization, indicating the importance of  
42 collagen formation and organelle organization for body size growth in cattle. The integrative  
43 network construction distinguished 62 and 66 genes with different co-expression patterns  
44 associated with higher and lower phenotypic groups of body measurements respectively, and the  
45 two sub-networks were distinct. Gene ontology and pathway annotation further showed that all  
46 shared genes in phenotypic differences participate in many biological processes related to the  
47 growth and development of the organism. Together, these findings provide a deep insight into rare  
48 genetic variants of growth traits in cattle and this will have a promising application in animal  
49 breeding.

50

51 **Key words**

52 Whole-exome sequencing; cattle; body measurement; rare variants; network

53

54 **Running title:** Rare variants and cattle growth traits

55

56

## 57 **1. Introduction**

58 Beef cattle production plays an important role in Chinese agribusiness. According to the statistics  
59 by China's Ministry of Agriculture, beef production has five years of continuous growth, up to  
60 83% increase by 2015 than 2011. Many breeds specialized in meat production are reared in China,  
61 but Simmental breed accounts for more than 70% of beef-producing herds. Growth traits are  
62 traditionally included in selection criteria in beef cattle breeding programs. Body linear  
63 measurements, specifically body length and girth, have been shown to be useful predictors of  
64 cattle liveweight (Enevoldsen and Kristensen, 1997; Lukuyu et al., 2016).

65 With the genome sequencing of common cattle, more and more interaction between genes  
66 and environments are determined to steadily increase the quality and quantity of dairy and cattle  
67 meat in global (Zimin et al., 2009). Recently, a few novel genetic loci associated with quantitative  
68 traits have been detected by genome-wide association studies in bovine and other livestock species  
69 using high or low-density SNP array and sequencing approach. For instance, eight significantly  
70 SNPs, seven potential genes, and two most important quantitative trait loci regions were identified  
71 for improved lactation persistency in Holstein cattle (Pertille et al., 2017). In addition, by focusing  
72 on beef cattle, numerous SNPs, genes and haplotype blocks were discovered associated with  
73 growth (Jahuey-Martinez et al., 2016; Sorbolini et al., 2017). In our previous study, pathway-  
74 based GWAS method was applied to identify novel loci and candidate genes of complex  
75 quantitative economically important traits in beef cattle (Fan et al., 2015; Xia et al., 2017). We  
76 further identified the DCAF16-NCAPG region as a susceptibility locus for average daily gain in  
77 Chinese Simmental cattle (Zhang et al., 2016b).

78 In general, the current association studies have been performed for identification of common  
79 variants to explain the complex traits (Bush and Moore, 2012; Hirschhorn and Daly, 2005).  
80 Despite their value, the GWAS-based studies may have some problems like population  
81 stratification, reproducibility and high false positive. Furthermore, the functional validation of the  
82 GWAS result is the major challenge. In addition, the commercial designed SNP arrays were  
83 mainly focused on common variants with a high frequency in the population. Thus, the studies  
84 failed to discover those low-frequency/rare genetic variants that may affect functional properties,  
85 especially in certain specific breeds (Clayton et al., 2005; Donnelly, 2008). To overcome these  
86 shortcomings, there is a trend to integrate more rare variations for follow-up functional validation.  
87 For example, whole-genome sequencing analysis has demonstrated the advantage to map rare  
88 genetic variants that affect quantitative traits in cattle and other livestock with complex familial  
89 relationships (Zhang et al., 2016a). In addition, rare causative variants could improve genomic  
90 prediction, but careful selection of markers was needed (van den Berg et al., 2016).

91 It is worth noting that the majority studies focused on dairy cattle instead of beef cattle. The  
92 comprehensive evaluation of rare variants in beef cattle is still lacking. By using the whole exome  
93 sequencing (WES) to economically important traits, we performed the first study to explore the

94 rare variants associated with growth traits in Simmental cattle. The results provide a better  
95 genomics prediction and more accuracy of gene marker selection for complex traits in beef cattle.

96

## 97 **2. Materials and methods**

### 98 **2.1 Cattle population, phenotypes, genotyping and GWAS for body measurements in** 99 **Simmental cattle**

100 Since 2008, we established the Simmental cattle population in Ulgai, Inner Mongolia, China. A  
101 total of 1141 Simmental beef cattle born between 2008 and 2014. Phenotypic data including  
102 growth traits like body length, height, hip height, heart girth, and abdominal girth was collected at  
103 regular intervals. For each animal, 10 mL of venous blood was collected from the jugular vein and  
104 then stored at  $-20^{\circ}\text{C}$ . The DNAs were extracted from the blood samples and were genotyped using  
105 Illumina BovineHD BeadChip. Genome wide association studies (GWASs) analyses were  
106 implemented based on mixed linear model as we described previously (Xia et al., 2016; Zhang et  
107 al., 2016c).

108

### 109 **2.2 Sample collection and whole exome sequencing**

110 To investigate a systematic survey of growth traits in beef cattle, body length and body girth were  
111 chosen as two parameters for stature in this study. The two traits in accordance with the phenotype  
112 value were divided into high and low groups, respectively. The criteria were: i) 18-month-old  
113 phenotypic data were used at which time a calf almost reached maturity. ii) each of high or low  
114 group had five samples, randomly selecting from the top 20 or bottom 20 ranked-list of phenotype  
115 data.

116 Approximately  $1\mu\text{g}$  to  $2\mu\text{g}$  of DNA was obtained and quantified using Blood DNA Kit,  
117 Nanodrop and Qubit fluorometer. Exome capture was accomplished using the Agilent SureSelect  
118 All Exon Bovine (54Mb design based on University of Maryland build 3.1, covering coding  
119 regions as well as miRNA and SNP targets). Sequencing was performed using the Illumina  
120 HiSeq4000 system at an average coverage depth of over 150X (Shanghai OE Biotechnology Co.,  
121 Lt, China).

122

### 123 **2.3 The bioinformatics pipeline for variant calling and filtering**

124 The second and third phases for the WES analysis were to detect, annotate and filter genetic  
125 variants for each cattle sample. To this aim, we filter out those low-quality reads by using  
126 NGSQC-Toolkit (v2.3.3). Briefly, we firstly removed those raw reads with Q20 value less than  
127 70%, which represented the ratio of bases with probability of containing no more than one error in  
128 100 bases. Then we trimmed reads shorter than 70 bases afterwards to obtain high-quality reads.  
129 Next, all high-quality paired reads were extracted with SAM flags in the raw BAM files using  
130 Samtools (version 0.1.19) (Li et al., 2009). In each sample, the short reads were aligned to the  
131 bovine reference genome, University of Maryland build (UMD 3.1) using BWA-mem (version

132 0.7.5a) (Jiang et al., 2010). The mapped reads were sorted and indexed by using Samtools (version  
133 0.1.19) (Li et al., 2009). The mpileup command in Samtools toolkit (version 0.1.19) was applied  
134 to call single nucleotide variant (SNV), and insertion/deletion (INDEL) variants using the BAQ  
135 (Base Alignment Quality) with cut-off of 13 and minimum/maximum read depth cut-off of 1/8000.  
136

#### 137 **2.4 The functional enrichment and QTL analysis**

138 Through capture sequencing, hundreds of rare nonsynonymous variants were identified to be  
139 associated with four trait groups, and we hypothesized that there might be commonalities or  
140 similarities in the biological functions of the affected genes for body growth traits. To explore  
141 those potential central pathways involving the cattle growth, we run gene ontology (GO) and  
142 KEGG pathway enrichment analysis by inputting those mutated genes against all the cattle  
143 protein-coding genes as background. Comparing our 886 mutated genes, the statistically  
144 overrepresented GO terms and KEGG pathways were listed using BovineMine (Elsik et al., 2016).  
145 The biological processes and interrelated genes were graphically displayed as we described  
146 previously (Zhao et al., 2009; Zhao et al., 2013). In addition, the cattle QTL information was  
147 downloaded from animal QTL database (Hu et al., 2013) and mapped to genes according to the  
148 official gene symbols.

149

#### 150 **2.5 Sub-network extraction for the genes with genetic changes from a co-expression network** 151 **in cattle**

152 To elucidate genetic variations on a global scale, we mapped the variants to the corresponding  
153 genes and constructed the gene co-expression network. The gene co-expression network was built  
154 based on gene profiles derived from 92 different tissues from Bovine Genome Database (BGD)  
155 (Elsik et al., 2016). These data are generated by single-end RNAseq with 100 bp reads running on  
156 Illumina HiSeq 2000. By mapping to genome, BGD has normalized the read counts for each tissue.  
157 The normalized FPKM (Fragments Per Kilobase of transcript per Million mapped reads) value  
158 was used to calculate the co-expression based on WGCNA (Weighted Gene Correlation Network  
159 Analysis) methods. In total, we identified 72,306 pairs of genes that are co-expressed over 92  
160 tissues (Chen et al., 2017). To explore the biological mechanisms related to genes that may exert  
161 the consistent effects in high phenotype groups for body girth and length traits (BG\_H and BL\_H),  
162 we extracted the protein-protein interactions between 62 identified genes with the remaining cattle  
163 genes. The similar network mapping approach was applied to the 66 genes shared between low  
164 phenotype groups (BG\_L and BL\_L groups). For co-expression based interactions, we used the  
165 Steiner minimal tree algorithm implemented in our previous studies to extract a sub-network  
166 related to the input genes (Kong et al., 2013). In this algorithm, all inputted genes were mapped to  
167 the co-expression based interactome. Finally, a minimum sub-network with inputted genes  
168 connected by shortest path was produced. The final network visualization was performed using  
169 Cytoscape (Shannon et al., 2003).

170

### 171 **3. Results**

#### 172 **3.1 Genome-wide association studies (GWAS) for body measurements in Simmental cattle**

173 Given the economic importance of growth traits in beef cattle, genome-wide association studies  
174 (GWASs) for body measurements including five traits (body length, height, hip height, heart girth,  
175 and abdominal girth) were performed in 1141 Simmental cattle using Illumina BovineHD  
176 BeadChip. However, we found there were no SNPs exceeding significant level ( $P < 5 \times 10^{-7}$ ) for the  
177 five traits related to body measurements. Therefore, these results indicate common variants of  
178 small effect in polygenic model may not be tagged by genotyping arrays. Manhattan plots and  
179 quantile-quantile (Q-Q) plots of genome-wide association results were showed in Figure 1.

180

#### 181 **3.2 The sample information and an overview for whole exome sequencing classified into four** 182 **groups related to body length and girth**

183 Since we did not find any significant SNPs and enriched gene regions associated with Simmental  
184 body measure traits based on the GWAS method, we further sought to identify rare and novel  
185 genetic variants with large effects on body size measurement to predict cattle liveweight and  
186 visual assessment to meat production, growth and development, and nutritional. Taking into  
187 account the contributions of body length and girth, the 20 samples we collected were classified  
188 into four distinct trait groups: high body girth (BG\_H), low body girth (BG\_L), high body length  
189 (BL\_H), and low body length (BL\_L), based on sorting the value of phenotypic data. The detail  
190 characteristics were summarized (Table S1). To identify the potential rare variants associated with  
191 body girth and length, we conducted a three-phase analysis process for whole exome sequencing  
192 and follow-up bioinformatics analysis (Figure 2). By using the Agilent SureSelect All Exon  
193 Bovine toolkit (54 Mb design covering protein-coding regions and SNP targets), all the samples  
194 were loaded to Illumina HiSeq4000 for sequencing. In the second phase, we conducted the  
195 bioinformatics data processing step by step (see methods for detail parameters): i) data quality  
196 control to remove low quality reads; ii) map to Bovine UMD 3.1 genome; iii) call and annotate the  
197 genetic variants. In our last analysis stage, we started from all the identified genetic variants in the  
198 20 samples. After excluding those synonymous and common variants in the population, we  
199 focused on the rare non-synonymous variants shared in different trait groups. The set-based  
200 analyses were conducted to identify key rare variants shared in different trait combination.

201

#### 202 **3.3 The variant filtering and functional analysis for the nonsynonymous rare variants**

203 A step-by-step variant filtering approach was applied to narrow down the candidate genetic  
204 variants associated with four trait groups (BG\_H, BG\_L, BL\_H and BL\_L). For example, we  
205 identified 45,896 variants shared by the five samples from BG\_H group (Figure 3A, Table S2). By  
206 filtering out the synonymous variants, we found a total of 22,788 nonsynonymous variants. By  
207 further removing the common variants with SNP IDs from the dbSNP database, we narrowed

208 down the list to 1158 rare variants, which could be mapped to 299 genes. To obtain precise genetic  
209 variants for different traits, the same variants filtering was applied to those genetic variants shared  
210 by all the samples in the other three trait groups. Finally, we identified 302, 263, and 283 genes  
211 associated with the rare variants for BG\_L, BL\_H, and BL\_L groups respectively.

212 As shown in Figure 3B, the four trait groups shared some associated genes. Basically, there  
213 were relative less shared genes between two BG groups (BG\_H and BG\_L) and BL groups (BL\_H  
214 and BL\_L). To provide an overview for those genes, we performed functional enrichment on all  
215 the identified 886 unique genes (union analysis, Table S3). The interesting finding was that these  
216 genes were more likely to be involved in various developmental processes (Figure 3C, Table S4),  
217 including single-organism development process (adjusted  $P$ -value =  $2.71E-08$ ), developmental  
218 process (adjusted  $P$ -value =  $5.72E-08$ ), anatomical structure morphogenesis (adjusted  $P$ -value =  
219  $2.40E-06$ ), multicellular organism development (adjusted  $P$ -value =  $7.23E-06$ ), and nervous  
220 system development (adjusted  $P$ -value =  $4.86E-02$ ). In addition, we also identified a number of  
221 organelle organization related functional GO terms, including cellular component organization  
222 (adjusted  $P$ -value =  $5.79E-04$ ), cellular component organization or biogenesis (adjusted  $P$ -value =  
223  $1.37E-03$ ), organelle organization (adjusted  $P$ -value =  $1.94E-03$ ), single-organism organelle  
224 organization (adjusted  $P$ -value =  $3.00E-03$ ), and movement of cell or subcellular component  
225 (adjusted  $P$ -value =  $3.67E-02$ ). The further KEGG pathway analysis revealed that these genes  
226 were significantly over-represented in six pathways, including Laminin interactions (adjusted  $P$ -  
227 value =  $1.13E-05$ ), Collagen formation (adjusted  $P$ -value =  $3.12E-04$ ), Extracellular matrix  
228 organization (adjusted  $P$ -value =  $1.92E-03$ ), Collagen biosynthesis and modifying enzymes  
229 (adjusted  $P$ -value =  $1.50E-02$ ), Assembly of collagen fibrils and other multimeric structures  
230 (adjusted  $P$ -value =  $4.16E-02$ ), and Rho GTPase cycle (adjusted  $P$ -value =  $4.61E-02$ ).

231

### 232 **3.4 Genetic and network difference between high and low body measurement phenotype** 233 **groups in cattle**

234 Our focus on those samples with the same characteristics of a trait can help identify the shared  
235 genetic variations. For instance, we identified 45,896 and 42,607 shared variants among five  
236 samples from high and low phenotype groups of body girth trait (BG\_H and BG\_L), respectively.  
237 By intersecting these two set, we characterized 17,466 and 14,177 genetic variations unique for  
238 BG\_H and BG\_L samples (Figure 4). The same intersecting analysis was applied to two groups of  
239 body length trait (BL\_H and BL\_L), and 14,774 and 17,399 genetic variations were found unique  
240 to BL\_H and BL\_L respectively.

241 Regardless of the cause, traits with high degree of genetic correlation (whether positive or  
242 negative) are generally considered to be under the control of the genes with linkage or pleiotropy.  
243 Since BG and BL are highly positive genetic related traits, we further focused on those genetic  
244 variations shared by the similar phenotype with higher value in BG\_H and BL\_H samples, which  
245 may be associated with growth and gain of weight of cattle. As shown in Figure 4, there were a

246 total of 3358 genetic variants shared between BG\_H and BL\_H groups. The same intersecting  
247 analysis identified 2968 variants shared by the lower phenotype groups in BG\_L and BL\_L  
248 samples. By conducting step-by-step variant filtering, we first harvested 69 nonsynonymous rare  
249 variants for both high groups (BG\_H and BL\_H), which could be mapped to 62 genes (Table  
250 S5\_a). For example, *BIN2* and *ERAPI1* had rare mutations at donor or acceptor sites in the splice  
251 region. There were two rare mutations were located in *ANGEL2* and *SPATA22* occurred in the 5'  
252 UTR; and two insertion/deletion in the corresponding genes, *CLSPN* and *MUC3A*, respectively  
253 caused the disruption of the open reading frame. Most importantly, we identified four missense  
254 variants in the coding region of four genes, *SCN5A*, *BOLA-DRB3*, *FADS2* and  
255 *ENSBTAG0000046327*, which may lead to the functional changes or even deficiencies of the  
256 encoding proteins. The same approach was applied to BG\_L and BL\_L groups and identified 66  
257 genes with 67 nonsynonymous rare variants shared between these two low groups (Table S5\_b).  
258 For example, *EDN3* and *AKR1E2* had rare mutations at donor or acceptor sites in the splice region;  
259 seven rare mutations induced to frameshift of the coding region in *IGFN1*, *LPIN1* and other five  
260 genes. It is noted that one missense mutation occurred in a novel gene, *ENSBTAG0000007696*,  
261 which encode an uncharacterized protein involving endoplasmic reticulum (ER) to Golgi vesicle-  
262 mediated transport and protein localization to pre-autophagosomal structure. Gene ontology and  
263 pathway annotation analysis showed that all shared 62 and 66 genes in phenotypic differences  
264 participate in many biological processes related to the growth and development of the organism,  
265 such as regulation of cell differentiation and proliferation (*EDN3*), growth factor activity  
266 (*VEGFC*), fatty acid biosynthetic and metabolic process (*FADS2*), bone morphogenesis (*GLG1*),  
267 and signal transduction (*MRAS*, *TYK2* and *GSK3B*).

268 The co-expressed genes in cell may mediate similar biological function and form connected  
269 functional modules to play a pivotal role. Previous studies revealed that the whole co-expression  
270 network in cattle ('interactome') (1) follows a power-law degree distribution, (2) exhibits the  
271 small world behaviour and (3) tends to be modular (Beiki et al., 2016; Chen et al., 2017; Ghorbani  
272 et al., 2015). Therefore, identification of sub-networks with special characteristics using graphical  
273 approaches can also lead to biologically relevant insights. In general, the densely-interconnected  
274 gene-gene pairs in a global co-expression network often correspond to functionally related groups  
275 of genes that can be defined as modules. To further explore the biological function and improve a  
276 systems-level understanding of the relations for the 62 (shared by two high groups in BL\_H and  
277 BG\_H) and 66 genes (shared by two low groups in BL\_L and BG\_L) from strict filtering, we  
278 performed the gene co-expression based network analysis on the two gene lists separately. By  
279 using a module extraction algorithm, we connected those input genes as more as possible.  
280 Therefore, there were two types of genes in the final output network: the genes from our  
281 interesting genes and the linker genes to connect those genes. As shown in Figure 5, the  
282 reconstructed sub-network specific for the 62 genes shared by the higher phenotype groups (BL\_H



283 and BG\_H) was distinct from the 66 genes shared by the lower phenotype groups (BL\_L and  
284 BG\_L) in terms of their gene co-expressions.

285

#### 286 **4. Discussion**

287 Growth traits like body height, length and girth are classic quantitative traits, reflecting the  
288 combined influence of multiple polygenic factors. Thus, the study of growth traits is an ideal  
289 opportunity to dissect the architecture of a highly polygenic trait in human, animal or livestock.  
290 Several common variants associated with phenotypic variation in human height were detected,  
291 such as two variants in the region of *HMGA2* (Weedon et al., 2007) and *GDF5-UQCC* (Sanna et  
292 al., 2008). Moreover, a meta-GWAS analysis for human height identified ten newly loci strongly  
293 associated with variation in height, and found several pathways, like let-7 targets and Hedgehog  
294 signalling, as important regulators of human stature (Lettre et al., 2008). However, these  
295 significant loci together only account for around 2% of the population variation in height together.  
296 Similarly another study found that hundreds of variants clustered in genomic loci also explained  
297 no more than 10% phenotypic variation (Lango Allen et al., 2010). On the other hand, the same  
298 researches on dissection the genetic variants of body size traits have been conducted on livestock  
299 like sheep (Berenos et al., 2015), cattle (Gutierrez-Gil et al., 2009), pig (Guo et al., 2015).  
300 Numerous candidate regions and genes have been screened. For instance, the candidate gene  
301 *NCAPG* where a non-synonymous but chemically conserved variant was proposed to be a  
302 potential causative variant for body frame size in cattle (Setoguchi et al., 2011). Similarly, SNPs  
303 resided in *NCAPG* and *LCORL* genes have also been reported to be associated with several body  
304 size traits for horse breeding (Signer-Hasler et al., 2012). Overall, GWAS studies have identified  
305 large numbers of loci and variants that implicate biologically relevant genes and pathways of  
306 growth traits; however, they mainly focused on the common genetic variants and explained a  
307 limited genetic contribution. Thus, additional approaches are needed to fully dissect the genetic  
308 architecture of growth traits. Traditionally, growth traits are included in selection criteria of beef  
309 cattle breeding programs, and specifically body length and girth have been shown to be a useful  
310 predictors for cattle liveweight (Enevoldsen and Kristensen, 1997) (Lukuyu et al., 2016).  
311 Considering that our GWAS results for five growth traits (body length, height, hip height, heart  
312 girth, and abdominal girth) have no significant loci detected ( $P < 5 \times 10^{-7}$ ) in beef cattle, we used  
313 exome sequencing analysis to capture the rare and novel variants associated with body length and  
314 girth.

315 Through the gene annotation and functional enrichment analysis for candidate rare variants in  
316 four trait groups (BG\_H, BG\_L, BL\_H and BL\_L), 886 unique genes in four trait groups were  
317 found to be associated with various developmental processes and organelle organization related  
318 functional terms. Interestingly, multiple genetic loci for body size were also confirmed to be  
319 associated with developmental pathways by using GWAS studies in Chinese Holstein cattle  
320 (Zhang et al., 2017). We also identified a number of organelle organization related functional

321 terms. For Eukaryotic organisms, there is precise regulatory mechanism on their growth across the  
322 diverse length scales of biological organization. Recent studies in intestine of *C. elegans* worm  
323 revealed that the volume of the nucleolus is directly proportional (isometric) to cell size during  
324 larval development (Uppaluri et al., 2016). Furthermore, the relative size of the nucleolus is  
325 predictive of the growth rate of the entire worm. Similarly, our result suggested that the growth in  
326 organelle level could be involved in the growth in tissue and body development.

327 In addition, six significantly over-represented pathways were identified by KEGG pathway  
328 analysis for these genes, which are mainly related to the Collagen formation and biosynthesis,  
329 Collagen and modifying enzymes, and Collagen fibrils assembly. Previously studies reported that  
330 the diameter of collagen fibrils could increase gradually during embryogenesis, tissue growth and  
331 body size (Pilotto and Filosi, 1977). Recent molecular mechanism studies revealed that hydrolysed  
332 collagen intake could increase bone mass of growing in rats (Takeda et al., 2013). Combined with  
333 the results from GO enrichment analysis, our results highlight the potential importance of collagen  
334 formation and organelle organization for body size growth in multicellular organisms.

335 Since body girth has highly positive genetic correlation with body length, the analysis of  
336 those genetic variants shared by same level (higher or lower) of BG and BL samples may help to  
337 further identify candidate genes associated with growth and gain of weight in cattle. As shown in  
338 Figure 5, we reconstructed sub-network specific for 62, 66 genes shared by BL\_H and BG\_H,  
339 BL\_L and BG\_L group respectively to investigate their gene co-expressions. In the sub-network  
340 of high phenotype in BL\_H and BG\_H groups, the *INTS1*, a subunit of the integrator complex and  
341 mediated 3-prime end processing of small nuclear RNAs U1 and U2, was co-expressed with *ALK*,  
342 which plays an important role in the cell growth and brain development, and exerts its effects on  
343 specific neurons in the nervous system.(Motegi et al., 2004) We also found a linker gene *B2M*  
344 (Beta 2-Microglobulin), a component of the major histocompatibility complex in chordates, which  
345 has growth factor-like activity for cultured rat cells (Centrella et al., 1989) and thus may have an  
346 impact on the body length and girth of cattle. Meanwhile, another calpastatin gene *CAST* mapped  
347 to BTA7 was also linked to multiple growth-related traits in view of our QTL-based analysis  
348 (Table S6\_a). Basically, previous studies suggested that *CAST* was associated with insulin-like  
349 growth factor 1 (*IGF-1*) levels and body weight, which may imply its key role in the body growth  
350 (Pintos and Corva, 2011). Another GWAS study proposed *CAST* gene also as a functional and  
351 positional candidate gene for carcass and meat quality traits in beef cattle (Curi et al., 2010; Curi  
352 et al., 2009). In general, comparing to GWAS-based association studies, our rare variants-based  
353 approach is powerful to identify genes directly affect phenotype at the molecular level, rather than  
354 merely conferring the association or risk. Therefore, these genes may have potential direct links to  
355 the body size control at the cellular level. Moreover, we focused on the network for the 66 genes  
356 shared by the lower phenotype in BL\_L and BG\_L groups, and found two genes (*DSC2* and  
357 *DZIP3*) associated with multiple reproductive traits such as conception rate and daughter  
358 pregnancy rate (Table S6\_b). Additionally, the putative candidate gene *TOP2B* is known to be

359 associated with various neurodevelopmental conditions (Harkin et al., 2016), and a recent study  
360 suggested that *de novo TOP2B* mutation may lead to global developmental delay and intellectual  
361 disability (Lam et al., 2017). In summary, our study has identified many co-expressed genes with  
362 genetic rare mutations. A number of these genes are turned out to be associated with other  
363 complex traits, which suggest their potential links to phenotypes.

364 In conclusion, we have presented the first whole exome-capture sequencing study of body  
365 girth and length for Simmental cattle and the network view of genetic changes against the whole  
366 proteome in cattle. Our study provides not only a comprehensive genetic resource of beef cattle  
367 for the effective breeding but also illustrated a comprehensive mutational catalogue for body  
368 growth-related trait. The identified genes may reveal the importance of collagen formation and  
369 organelle organization for body size growth in multicellular organisms. By analysis the genes with  
370 rare nonsynonymous variants, we identified several genes with association to body growth and  
371 reproduction.

372

373

374

#### 375 **Availability**

376 The sequence data reported in this study have been deposited in the genome sequence archive of  
377 Beijing Institute of Genomics, Chinese Academy of Sciences ([gsa.big.ac.cn](http://gsa.big.ac.cn)) under the accession  
378 no. PRJCA000519, PRJCA000515, PRJCA000513, and PRJCA000510.

379

#### 380 **Acknowledgments**

381 This work was supported by grants from the National Natural Science Foundation of China  
382 (31402039), Cattle Breeding Innovative Research Team of Chinese Academy of Agricultural  
383 Sciences (cxgc-ias-03), the National Beef Cattle Industrial Technology System (CARS-37), China  
384 Scholarship Council (CSC), and the start-up grant to Dr. Min Zhao.

385

#### 386 **Conflict of interest**

387 The authors declare that they have no competing interests.

388

389

390 **Figure legends**

391

392 **Figure 1. Manhattan plots and quantile-quantile (Q-Q) plots of genome-wide association**  
393 **results for body measurement in Simmental cattle.** (a) body length, (b) heart girth, (c) height,  
394 (d) hip height, (e) abdominal girth.

395

396 **Figure 2. Whole-exome sequencing (WES) analysis pipeline.**

397 The WES analysis occurred through three phases. In phase 1, all the exome DNA in the collected  
398 samples were extracted, sheared and enriched by Agilent SureSelect for sequencing on Illumina  
399 HiSeq4000. In phase 2, all the raw reads underwent quality controlling, genome mapping, variant  
400 calling and annotation. In phase 3, only those highly likely to affect protein quantity or function  
401 (nonsynonymous exonic single-nucleotide variants [i.e., missense or nonsense], insertions and  
402 deletions, splice variants) were selected for further analysis. Among these non-synonymous  
403 variants, those common variants mapped to dbSNP were excluded to yield candidate rare variants.  
404 Following exclusionary quality-control filter, only rare non-synonymous variants were compared  
405 in all four distinct groups: higher body girth (BG\_H), lower body girth (BG\_L), higher body  
406 length (BL\_H), and lower body length (BL\_L). INDEL = insertion and deletion; SNV = single-  
407 nucleotide variants; RV =rare variant.

408

409 **Figure 3. The variant filtering and functional analysis of genes associated with four different**  
410 **groups.**

411 (A) The variant filtering statistics for four distinct groups: higher body girth (BG\_H), lower body  
412 girth (BG\_L), higher body length (BL\_H), and lower body length (BL\_L). (B) The relationship for  
413 all the 886 Ensemble genes associated with four different traits was presented. (C) Gene ontology  
414 (GO) enrichment analysis. The scatterplot showed the gene ontology (GO) cluster representatives  
415 for all the 886 genes in a two-dimensional space derived by applying multidimensional scaling to  
416 a matrix of the GO terms' semantic similarities. Bubble colour indicated the corrected *P*-values  
417 (bubbles of more significant terms were blue).

418

419 **Figure 4. The step-by-step variant filtering for identification of rare genes associated with**  
420 **higher and lower phenotype in body girth and body length.**

421 To identify shared genetic variants in higher body girth (BG\_H) and higher body length (BL\_H),  
422 we started with 14,774 BL\_H and 17,466 BG\_H unique variants. The 3358 shared variants were  
423 further filtered and mapped to 62 Ensemble genes. The same filtering pipeline was applied to  
424 lower body girth (BG\_L) and lower body length (BL\_L) and 66 shared genes were obtained.

425

426 **Figure 5. The respective sub-networks for the genes shared by the higher phenotype groups**  
427 **and the lower phenotype groups of body length and body girth in cattle.**

428 (A) the sub-network extracted from 62 genes shared by higher phenotype value in body girth  
429 group (BG\_H) and body length (BL\_H); (B) the sub-network extracted from 66 genes shared by  
430 lower phenotype value in body girth (BG\_L) and body length (BL\_L). The blue circles were the  
431 genes with rare variants in our data. The orange diamond shapes were the linker genes to connect  
432 those mutated genes for a fully-connected network.

433

434 **Supplementary data**

435

436 **Supplementary Table S1. Sample information.**

437 **Supplementary Table S2. All the genetic variants shared by all the samples in the same trait**  
438 **groups. (a) BG\_H, (b) BG\_L, (c) BL\_H, (d) BL\_L.**

439 **Supplementary Table S3. The 886 unique genes associated with rare nonsynonymous**  
440 **variants from all the samples.**

441 **Supplementary Table S4. The GO (gene ontology) and KEGG pathway enrichment analysis**  
442 **of 886 genes with rare nonsynonymous variants.**

443 **Supplementary Table S5. Rare variants shared by different phenotypic groups. (a) The 69**  
444 **rare variants shared by two higher phenotype groups in body girth (BG\_H) and body length**  
445 **(BL\_H). (b) The 67 rare variants shared by two lower phenotype groups in body girth (BG\_L) and**  
446 **body length (BL\_L).**

447 **Supplementary Table S6. Cattle QTL information from animal QTL database. (a) The**  
448 **QTL analysis of 62 genes associated with higher phenotype in body girth (BG\_H) and body length**  
449 **(BL\_H). (b) The QTL analysis of 66 genes associated with lower phenotype in body girth (BG\_L)**  
450 **and body length (BL\_L).**

451

452

453 **References**

- 454 Beiki, H., Nejati-Javaremi, A., Pakdel, A., Masoudi-Nejad, A., Hu, Z.L., Reecy, J.M., 2016.  
455 Large-scale gene co-expression network as a source of functional annotation for cattle  
456 genes. *Bmc Genomics* 17.
- 457 Berenos, C., Ellis, P.A., Pilkington, J.G., Lee, S.H., Gratten, J., Pemberton, J.M., 2015.  
458 Heterogeneity of genetic architecture of body size traits in a free-living population. *Mol*  
459 *Ecol* 24, 1810-1830.
- 460 Bush, W.S., Moore, J.H., 2012. Chapter 11: Genome-Wide Association Studies. *Plos Comput*  
461 *Biol* 8.
- 462 Centrella, M., McCarthy, T., Canalis, E., 1989. Beta 2-microglobulin enhances insulin-like  
463 growth factor I receptor levels and synthesis in bone cell cultures. *Journal of Biological*  
464 *Chemistry* 264, 18268-18271.
- 465 Chen, Y., Liu, Y.N., Du, M., Zhang, W.G., Xu, L., Gao, X., Zhang, L.P., Gao, H.J., Xu, L.Y., Li,  
466 J.Y., Zhao, M., 2017. Constructing a comprehensive gene co-expression based  
467 interactome in *Bos taurus*. *Peerj* 5.
- 468 Clayton, D.G., Walker, N.M., Smyth, D.J., Pask, R., Cooper, J.D., Maier, L.M., Smink, L.J.,  
469 Lam, A.C., Ovington, N.R., Stevens, H.E., Nutland, S., Howson, J.M.M., Faham, M.,  
470 Moorhead, M., Jones, H.B., Falkowski, M., Hardenbol, P., Willis, T.D., Todd, J.A., 2005.  
471 Population structure, differential bias and genomic control in a large-scale, case-control  
472 association study. *Nat Genet* 37, 1243-1246.
- 473 Curi, R.A., Chardulo, L.A., Giusti, J., Silveira, A.C., Martins, C.L., de Oliveira, H.N., 2010.  
474 Assessment of GH1, CAPN1 and CAST polymorphisms as markers of carcass and meat  
475 traits in *Bos indicus* and *Bos taurus*-*Bos indicus* cross beef cattle. *Meat Sci* 86, 915-920.
- 476 Curi, R.A., Chardulo, L.A., Mason, M.C., Arrigoni, M.D., Silveira, A.C., de Oliveira, H.N., 2009.  
477 Effect of single nucleotide polymorphisms of CAPN1 and CAST genes on meat traits in  
478 Nellore beef cattle (*Bos indicus*) and in their crosses with *Bos taurus*. *Anim Genet* 40,  
479 456-462.
- 480 Donnelly, P., 2008. Progress and challenges in genome-wide association studies in humans.  
481 *Nature* 456, 728-731.
- 482 Elsik, C.G., Unni, D.R., Diesh, C.M., Tayal, A., Emery, M.L., Nguyen, H.N., Hagen, D.E., 2016.  
483 Bovine Genome Database: new tools for gleaning function from the *Bos taurus* genome.  
484 *Nucleic Acids Res* 44, D834-839.

- 485 Enevoldsen, C., Kristensen, T., 1997. Estimation of body weight from body size  
486 measurements and body condition scores in dairy cows. *J Dairy Sci* 80, 1988-1995.
- 487 Fan, H., Wu, Y., Zhou, X., Xia, J., Zhang, W., Song, Y., Liu, F., Chen, Y., Zhang, L., Gao, X.,  
488 Gao, H., Li, J., 2015. Pathway-Based Genome-Wide Association Studies for Two Meat  
489 Production Traits in Simmental Cattle. *Sci Rep* 5, 18389.
- 490 Ghorbani, S., Tahmoorespur, M., Nejad, A.M., Nasiri, M.R., Asgari, Y., 2015. Analysis of the  
491 enzyme network involved in cattle milk production using graph theory. *Mol Biol Res*  
492 *Commun* 4, 93-103.
- 493 Guo, Y., Hou, L., Zhang, X., Huang, M., Mao, H., Chen, H., Ma, J., Chen, C., Ai, H., Ren, J.,  
494 Huang, L., 2015. A meta analysis of genome-wide association studies for limb bone  
495 lengths in four pig populations. *BMC Genet* 16, 95.
- 496 Gutierrez-Gil, B., Williams, J.L., Homer, D., Burton, D., Haley, C.S., Wiener, P., 2009. Search  
497 for quantitative trait loci affecting growth and carcass traits in a cross population of beef  
498 and dairy cattle. *J Anim Sci* 87, 24-36.
- 499 Harkin, L.F., Gerrelli, D., Gold Diaz, D.C., Santos, C., Alzu'bi, A., Austin, C.A., Clowry, G.J.,  
500 2016. Distinct expression patterns for type II topoisomerases IIA and IIB in the early foetal  
501 human telencephalon. *Journal of anatomy* 228, 452-463.
- 502 Hirschhorn, J.N., Daly, M.J., 2005. Genome-wide association studies for common diseases  
503 and complex traits. *Nat Rev Genet* 6, 95-108.
- 504 Hu, Z.L., Park, C.A., Wu, X.L., Reecy, J.M., 2013. Animal QTLdb: an improved database tool  
505 for livestock animal QTL/association data dissemination in the post-genome era. *Nucleic*  
506 *Acids Res* 41, D871-879.
- 507 Jahuey-Martinez, F.J., Parra-Bracamonte, G.M., Sifuentes-Rincon, A.M., Martinez-Gonzalez,  
508 J.C., Gondro, C., Garcia-Perez, C.A., Lopez-Bustamante, L.A., 2016. Genomewide  
509 association analysis of growth traits in Charolais beef cattle. *J Anim Sci* 94, 4570-4582.
- 510 Jiang, Y., Ying, W.T., Wu, S.F., Chen, M., Guan, W., Yang, D., Song, Y.P., Liu, X., Li, J.Q.,  
511 Hao, Y.W., Sun, A.H., Geng, C., Li, H., Mi, W., Zhang, Y.J., Zhang, J.Y., Chen, X.L., Li, L.,  
512 Gong, Y., Li, T., Ma, J., Li, D., Yuan, X.Y., Zhang, X.Q., Xue, X.F., Zhu, Y.P., Qian, X.H.,  
513 He, F.C., Zhong, F., Shen, H.L., Lin, C.Z., Lu, H.J., Liu, X.H., Wei, L.M., Cao, J., Yun, D.,  
514 Zhang, J., Gao, M.X., Fan, H.Z., Zhang, Y., Cheng, G., Yu, Y.Y., Xie, L.Q., Wang, H.,  
515 Zhang, X.M., He, F.C., Yang, P.Y., Shi, L., Tong, W., Li, X.L., Wang, Y., Liu, S.Q., Sheng,  
516 Q.H., Zeng, R., Sun, Y.L., Xu, Y., Cai, J.Q., He, P., Gao, H.J., Zhao, X.H., Tan, Y.X., Yan,  
517 H.X., Yang, Y., Wang, H.Y., Huang, J., Han, Z.G., He, Q.Y., Chen, P., Liang, S.P., Zhao,  
518 M., Mao, X.Z., Wei, L.P., Yu, H., Cao, Z.W., Li, Y.X., Dai, W.J., Jiang, H.C., Wang, D.G.,  
519 Zheng, J.J., Gao, X., Tang, Y., Li, X.Y., Cheng, J.P., Liu, Y.H., Zhang, X.N., Wang, X.F.,



- 520 Jia, J.D., An, D.C., Wang, Z., Li, Q., Cui, T., Proteome, C.H.L., 2010. First Insight into the  
521 Human Liver Proteome from PROTEOMESKY-LIVERHu 1.0, a Publicly Available  
522 Database. *J Proteome Res* 9, 79-94.
- 523 Kong, L., Cheng, L., Fan, L.Y., Zhao, M., Qu, H., 2013. IQdb: an intelligence quotient score-  
524 associated gene resource for human intelligence. Database (Oxford) 2013, bat063.
- 525 Lam, C.W., Yeung, W.L., Law, C.Y., 2017. Global developmental delay and intellectual  
526 disability associated with a de novo TOP2B mutation. *Clin Chim Acta* 469, 63-68.
- 527 Lango Allen, H., Estrada, K., Lettre, G., Berndt, S.I., Weedon, M.N., Rivadeneira, F., Willer,  
528 C.J., Jackson, A.U., Vedantam, S., Raychaudhuri, S., Ferreira, T., Wood, A.R., Weyant,  
529 R.J., Segre, A.V., Speliotes, E.K., Wheeler, E., Soranzo, N., Park, J.H., Yang, J.,  
530 Gudbjartsson, D., Heard-Costa, N.L., Randall, J.C., Qi, L., Vernon Smith, A., Magi, R.,  
531 Pastinen, T., Liang, L., Heid, I.M., Luan, J., Thorleifsson, G., Winkler, T.W., Goddard,  
532 M.E., Sin Lo, K., Palmer, C., Workalemahu, T., Aulchenko, Y.S., Johansson, A., Zillikens,  
533 M.C., Feitosa, M.F., Esko, T., Johnson, T., Ketkar, S., Kraft, P., Mangino, M., Prokopenko,  
534 I., Absher, D., Albrecht, E., Ernst, F., Glazer, N.L., Hayward, C., Hottenga, J.J., Jacobs,  
535 K.B., Knowles, J.W., Kutalik, Z., Monda, K.L., Polasek, O., Preuss, M., Rayner, N.W.,  
536 Robertson, N.R., Steinthorsdottir, V., Tyrer, J.P., Voight, B.F., Wiklund, F., Xu, J., Zhao,  
537 J.H., Nyholt, D.R., Pellikka, N., Perola, M., Perry, J.R., Surakka, I., Tammesoo, M.L.,  
538 Altmaier, E.L., Amin, N., Aspelund, T., Bhangale, T., Boucher, G., Chasman, D.I., Chen,  
539 C., Coin, L., Cooper, M.N., Dixon, A.L., Gibson, Q., Grundberg, E., Hao, K., Juhani  
540 Juntila, M., Kaplan, L.M., Kettunen, J., Konig, I.R., Kwan, T., Lawrence, R.W., Levinson,  
541 D.F., Lorentzon, M., McKnight, B., Morris, A.P., Muller, M., Suh Ngwa, J., Purcell, S.,  
542 Rafelt, S., Salem, R.M., Salvi, E., Sanna, S., Shi, J., Sovio, U., Thompson, J.R., Turchin,  
543 M.C., Vandenput, L., Verlaan, D.J., Vitart, V., White, C.C., Ziegler, A., Almgren, P.,  
544 Balmforth, A.J., Campbell, H., Citterio, L., De Grandi, A., Dominiczak, A., Duan, J., Elliott,  
545 P., Elosua, R., Eriksson, J.G., Freimer, N.B., Geus, E.J., Glorioso, N., Haiqing, S.,  
546 Hartikainen, A.L., Havulinna, A.S., Hicks, A.A., Hui, J., Igl, W., Illig, T., Jula, A., Kajantie,  
547 E., Kilpelainen, T.O., Koironen, M., Kolcic, I., Koskinen, S., Kovacs, P., Laitinen, J., Liu, J.,  
548 Lokki, M.L., Marusic, A., Maschio, A., Meitinger, T., Mulas, A., Pare, G., Parker, A.N.,  
549 Peden, J.F., Petersmann, A., Pichler, I., Pietilainen, K.H., Pouta, A., Ridderstrale, M.,  
550 Rotter, J.I., Sambrook, J.G., Sanders, A.R., Schmidt, C.O., Sinisalo, J., Smit, J.H.,  
551 Stringham, H.M., Bragi Walters, G., Widen, E., Wild, S.H., Willemsen, G., Zagato, L.,  
552 Zgaga, L., Zitting, P., Alavere, H., Farrall, M., McArdle, W.L., Nelis, M., Peters, M.J.,  
553 Ripatti, S., van Meurs, J.B., Aben, K.K., Ardlie, K.G., Beckmann, J.S., Beilby, J.P.,  
554 Bergman, R.N., Bergmann, S., Collins, F.S., Cusi, D., den Heijer, M., Eiriksdottir, G.,  
555 Gejman, P.V., Hall, A.S., Hamsten, A., Huikuri, H.V., Iribarren, C., Kahonen, M., Kaprio, J.,  
556 Kathiresan, S., Kiemenev, L., Kocher, T., Launer, L.J., Lehtimaki, T., Melander, O.,  
557 Mosley, T.H., Jr., Musk, A.W., Nieminen, M.S., O'Donnell, C.J., Ohlsson, C., Oostra, B.,  
558 Palmer, L.J., Raitakari, O., Ridker, P.M., Rioux, J.D., Rissanen, A., Rivolta, C., Schunkert,

559 H., Shuldiner, A.R., Siscovick, D.S., Stumvoll, M., Tonjes, A., Tuomilehto, J., van Ommen,  
560 G.J., Viikari, J., Heath, A.C., Martin, N.G., Montgomery, G.W., Province, M.A., Kayser, M.,  
561 Arnold, A.M., Atwood, L.D., Boerwinkle, E., Chanock, S.J., Deloukas, P., Gieger, C.,  
562 Gronberg, H., Hall, P., Hattersley, A.T., Hengstenberg, C., Hoffman, W., Lathrop, G.M.,  
563 Salomaa, V., Schreiber, S., Uda, M., Waterworth, D., Wright, A.F., Assimes, T.L., Barroso,  
564 I., Hofman, A., Mohlke, K.L., Boomsma, D.I., Caulfield, M.J., Cupples, L.A., Erdmann, J.,  
565 Fox, C.S., Gudnason, V., Gyllensten, U., Harris, T.B., Hayes, R.B., Jarvelin, M.R., Mooser,  
566 V., Munroe, P.B., Ouwehand, W.H., Penninx, B.W., Pramstaller, P.P., Quertermous, T.,  
567 Rudan, I., Samani, N.J., Spector, T.D., Volzke, H., Watkins, H., Wilson, J.F., Groop, L.C.,  
568 Haritunians, T., Hu, F.B., Kaplan, R.C., Metspalu, A., North, K.E., Schlessinger, D.,  
569 Wareham, N.J., Hunter, D.J., O'Connell, J.R., Strachan, D.P., Wichmann, H.E., Borecki,  
570 I.B., van Duijn, C.M., Schadt, E.E., Thorsteinsdottir, U., Peltonen, L., Uitterlinden, A.G.,  
571 Visscher, P.M., Chatterjee, N., Loos, R.J., Boehnke, M., McCarthy, M.I., Ingelsson, E.,  
572 Lindgren, C.M., Abecasis, G.R., Stefansson, K., Frayling, T.M., Hirschhorn, J.N., 2010.  
573 Hundreds of variants clustered in genomic loci and biological pathways affect human  
574 height. *Nature* 467, 832-838.

575 Lettre, G., Jackson, A.U., Gieger, C., Schumacher, F.R., Berndt, S.I., Sanna, S.,  
576 Eyheramendy, S., Voight, B.F., Butler, J.L., Guiducci, C., Illig, T., Hackett, R., Heid, I.M.,  
577 Jacobs, K.B., Lyssenko, V., Uda, M., Diabetes Genetics, I., Fusion, Kora, Prostate, L.C.,  
578 Ovarian Cancer Screening, T., Nurses' Health, S., SardiNia, Boehnke, M., Chanock, S.J.,  
579 Groop, L.C., Hu, F.B., Isomaa, B., Kraft, P., Peltonen, L., Salomaa, V., Schlessinger, D.,  
580 Hunter, D.J., Hayes, R.B., Abecasis, G.R., Wichmann, H.E., Mohlke, K.L., Hirschhorn,  
581 J.N., 2008. Identification of ten loci associated with height highlights new biological  
582 pathways in human growth. *Nat Genet* 40, 584-591.

583 Li, H., Handsaker, B., Wysoker, A., Fennell, T., Ruan, J., Homer, N., Marth, G., Abecasis, G.,  
584 Durbin, R., 2009. The Sequence Alignment/Map format and SAMtools. *Bioinformatics* 25,  
585 2078-2079.

586 Lukuyu, M.N., Gibson, J.P., Savage, D.B., Duncan, A.J., Mujibi, F.D.N., Okeyo, A.M., 2016.  
587 Use of body linear measurements to estimate liveweight of crossbred dairy cattle in  
588 smallholder farms in Kenya. *Springerplus* 5.

589 Motegi, A., Fujimoto, J., Kotani, M., Sakuraba, H., Yamamoto, T., 2004. ALK receptor tyrosine  
590 kinase promotes cell growth and neurite outgrowth. *J Cell Sci* 117, 3319-3329.

591 Pertille, F., Moreira, G.C.M., Zanella, R., Nunes, J.D.D., Boschiero, C., Rovadoscki, G.A.,  
592 Mourao, G.B., Ledur, M.C., Coutinho, L.L., 2017. Genome-wide association study for  
593 performance traits in chickens using genotype by sequencing approach. *Sci Rep* 7, 11.

594 Pilotto, F., Filosi, M., 1977. Relationship between collagen fibril diameters and body size.  
595 Study of fish derma. *Cell Tissue Res* 182, 119-131.

- 596 Pintos, D., Corva, P.M., 2011. Association between molecular markers for beef tenderness  
597 and growth traits in Argentinian angus cattle. *Anim Genet* 42, 329-332.
- 598 Sanna, S., Jackson, A.U., Nagaraja, R., Willer, C.J., Chen, W.M., Bonnycastle, L.L., Shen, H.,  
599 Timpson, N., Lettre, G., Usala, G., Chines, P.S., Stringham, H.M., Scott, L.J., Dei, M., Lai,  
600 S., Albai, G., Crisponi, L., Naitza, S., Doheny, K.F., Pugh, E.W., Ben-Shlomo, Y., Ebrahim,  
601 S., Lawlor, D.A., Bergman, R.N., Watanabe, R.M., Uda, M., Tuomilehto, J., Coresh, J.,  
602 Hirschhorn, J.N., Shuldiner, A.R., Schlessinger, D., Collins, F.S., Davey Smith, G.,  
603 Boerwinkle, E., Cao, A., Boehnke, M., Abecasis, G.R., Mohlke, K.L., 2008. Common  
604 variants in the GDF5-UQCC region are associated with variation in human height. *Nat*  
605 *Genet* 40, 198-203.
- 606 Setoguchi, K., Watanabe, T., Weikard, R., Albrecht, E., Kuhn, C., Kinoshita, A., Sugimoto, Y.,  
607 Takasuga, A., 2011. The SNP c.1326T>G in the non-SMC condensin I complex, subunit  
608 G (NCAPG) gene encoding a p.Ile442Met variant is associated with an increase in body  
609 frame size at puberty in cattle. *Anim Genet* 42, 650-655.
- 610 Shannon, P., Markiel, A., Ozier, O., Baliga, N.S., Wang, J.T., Ramage, D., Amin, N.,  
611 Schwikowski, B., Ideker, T., 2003. Cytoscape: A software environment for integrated  
612 models of biomolecular interaction networks. *Genome Research* 13, 2498-2504.
- 613 Signer-Hasler, H., Flury, C., Haase, B., Burger, D., Simianer, H., Leeb, T., Rieder, S., 2012. A  
614 genome-wide association study reveals loci influencing height and other conformation  
615 traits in horses. *PLoS One* 7, e37282.
- 616 Sorbolini, S., Bongiorno, S., Cellesi, M., Gaspa, G., Dimauro, C., Valentini, A., Macciotta,  
617 N.P.P., 2017. Genome wide association study on beef production traits in Marchigiana  
618 cattle breed. *J Anim Breed Genet* 134, 43-48.
- 619 Takeda, S., Park, J.H., Kawashima, E., Ezawa, I., Omi, N., 2013. Hydrolyzed collagen intake  
620 increases bone mass of growing rats trained with running exercise. *J Int Soc Sports Nutr*  
621 10, 35.
- 622 Uppaluri, S., Weber, S.C., Brangwynne, C.P., 2016. Hierarchical Size Scaling during  
623 Multicellular Growth and Development. *Cell Rep* 17, 345-352.
- 624 van den Berg, I., Boichard, D., Guldbandsen, B., Lund, M.S., 2016. Using Sequence  
625 Variants in Linkage Disequilibrium with Causative Mutations to Improve Across-Breed  
626 Prediction in Dairy Cattle: A Simulation Study. *G3 (Bethesda)* 6, 2553-2561.
- 627 Weedon, M.N., Lettre, G., Freathy, R.M., Lindgren, C.M., Voight, B.F., Perry, J.R., Elliott, K.S.,  
628 Hackett, R., Guiducci, C., Shields, B., Zeggini, E., Lango, H., Lyssenko, V., Timpson, N.J.,  
629 Burt, N.P., Rayner, N.W., Saxena, R., Ardlie, K., Tobias, J.H., Ness, A.R., Ring, S.M.,  
630 Palmer, C.N., Morris, A.D., Peltonen, L., Salomaa, V., Diabetes Genetics, I., Wellcome

- 631 Trust Case Control, C., Davey Smith, G., Groop, L.C., Hattersley, A.T., McCarthy, M.I.,  
632 Hirschhorn, J.N., Frayling, T.M., 2007. A common variant of HMGA2 is associated with  
633 adult and childhood height in the general population. *Nat Genet* 39, 1245-1250.
- 634 Xia, J., Qi, X., Wu, Y., Zhu, B., Xu, L., Zhang, L., Gao, X., Chen, Y., Li, J., Gao, H., 2016.  
635 Genome-wide association study identifies loci and candidate genes for meat quality traits  
636 in Simmental beef cattle. *Mamm Genome* 27, 246-255.
- 637 Xia, J.W., Fan, H.Z., Chang, T.P., Xu, L.Y., Zhang, W.G., Song, Y.X., Zhu, B., Zhang, L.P.,  
638 Gao, X., Chen, Y., Li, J.Y., Gao, H.J., 2017. Searching for new loci and candidate genes  
639 for economically important traits through genebased association analysis of Simmental  
640 cattle. *Sci Rep* 7, 9.
- 641 Zhang, Q., Gulbrandtsen, B., Calus, M.P., Lund, M.S., Sahana, G., 2016a. Comparison of  
642 gene-based rare variant association mapping methods for quantitative traits in a bovine  
643 population with complex familial relationships. *Genet Sel Evol* 48, 60.
- 644 Zhang, W., Li, J., Guo, Y., Zhang, L., Xu, L., Gao, X., Zhu, B., Gao, H., Ni, H., Chen, Y.,  
645 2016b. Multi-strategy genome-wide association studies identify the DCAF16-NCAPG  
646 region as a susceptibility locus for average daily gain in cattle. *Sci Rep* 6, 38073.
- 647 Zhang, W., Xu, L., Gao, H., Wu, Y., Gao, X., Zhang, L., Zhu, B., Song, Y., Bao, J., Li, J., Chen,  
648 Y., 2016c. Detection of candidate genes for growth and carcass traits using genome-wide  
649 association strategy in Chinese Simmental beef cattle. *Animal Production Science*, -.
- 650 Zhang, X., Chu, Q., Guo, G., Dong, G., Li, X., Zhang, Q., Zhang, S., Zhang, Z., Wang, Y.,  
651 2017. Genome-wide association studies identified multiple genetic loci for body size at  
652 four growth stages in Chinese Holstein cattle. *PLoS One* 12, e0175971.
- 653 Zhao, M., Chen, X., Gao, G., Tao, L., Wei, L., 2009. RLEdb: a database of rate-limiting  
654 enzymes and their regulation in human, rat, mouse, yeast and *E. coli*. *Cell Res* 19, 793-  
655 795.
- 656 Zhao, M., Li, X., Qu, H., 2013. EDdb: a web resource for eating disorder and its application to  
657 identify an extended adipocytokine signaling pathway related to eating disorder. *Sci China*  
658 *Life Sci* 56, 1086-1096.
- 659 Zimin, A.V., Delcher, A.L., Florea, L., Kelley, D.R., Schatz, M.C., Puiu, D., Hanrahan, F.,  
660 Pertea, G., Van Tassell, C.P., Sonstegard, T.S., Marçais, G., Roberts, M., Subramanian,  
661 P., Yorke, J.A., Salzberg, S.L., 2009. A whole-genome assembly of the domestic cow,  
662 *Bos taurus*. *Genome Biol* 10, R42.

663

664

665 **Figures**

666

667 **Figures 1.**

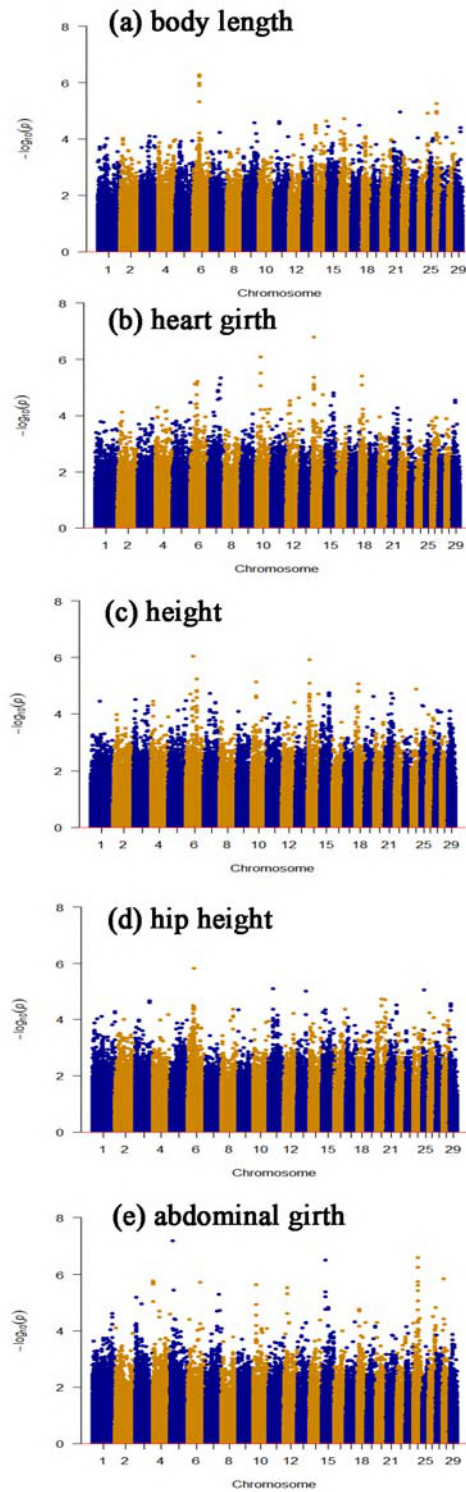

668

669 **Manhattan plots and quantile-quantile (Q-Q) plots of genome-wide association results for**  
670 **body measurement in Simmental cattle.**

671 (a) body length, (b) heart girth, (c) height, (d) hip height, (e) abdominal girth.

672

673

674 **Figures 2.**

675

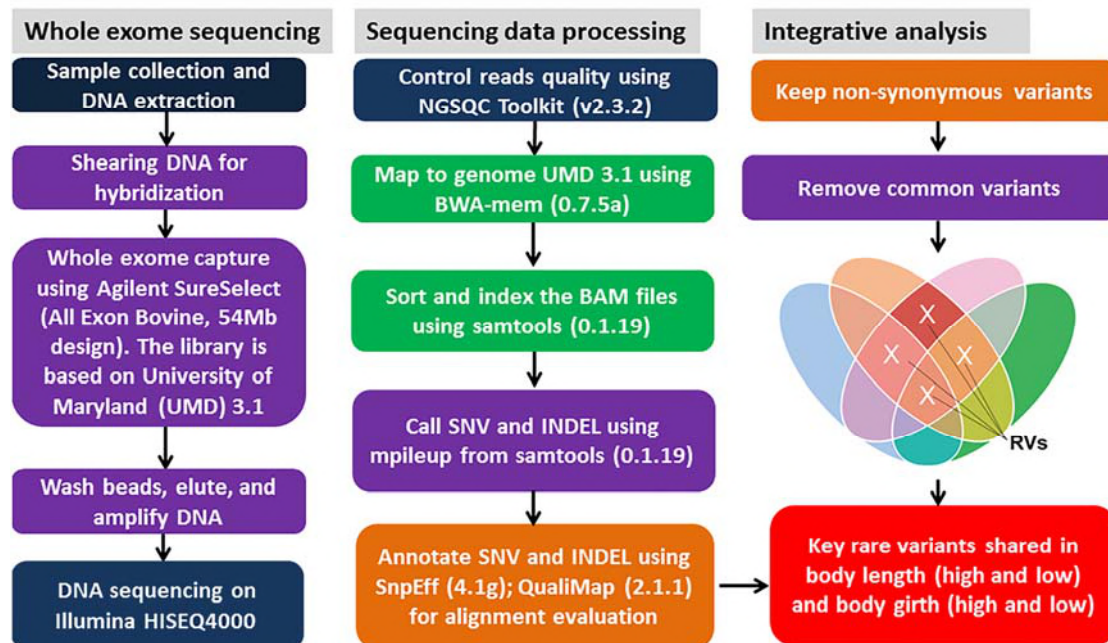

676

677

678 **Whole-exome sequencing (WES) analysis pipeline.**

679 The WES analysis occurred through three phases. In phase 1, all the exome DNA in the collected  
680 samples were extracted, sheared and enriched by Agilent SureSelect for sequencing on Illumina  
681 HiSeq4000. In phase 2, all the raw reads underwent quality controlling, genome mapping, variant  
682 calling and annotation. In phase 3, only those highly likely to affect protein quantity or function  
683 (nonsynonymous exonic single-nucleotide variants [i.e., missense or nonsense], insertions and  
684 deletions, splice variants) were selected for further analysis. Among these non-synonymous  
685 variants, those common variants mapped to dbSNP were excluded to yield candidate rare variants.  
686 Following exclusionary quality-control filter, only rare non-synonymous variants were compared  
687 in all four distinct groups: higher body girth (BG\_H), lower body girth (BG\_L), higher body  
688 length (BL\_H), and lower body length (BL\_L). INDEL = insertion and deletion; SNV = single-  
689 nucleotide variants; RV = rare variant.

690

691

692

693 **Figures 3.**

694

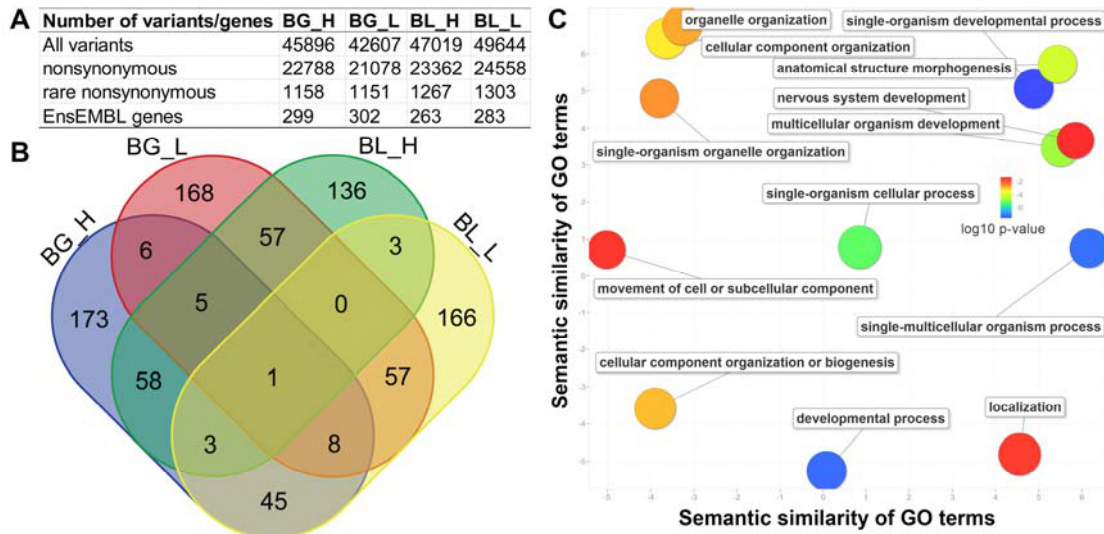

695

696

697 **The variant filtering and functional analysis of genes associated with four different groups.**

698 (A) The variant filtering statistics for four distinct groups: higher body girth (BG\_H), lower body  
 699 girth (BG\_L), higher body length (BL\_H), and lower body length (BL\_L). (B) The relationship for  
 700 all the 886 Ensembl genes associated with four different traits was presented. (C) Gene ontology  
 701 (GO) enrichment analysis. The scatterplot showed the gene ontology (GO) cluster representatives  
 702 for all the 886 genes in a two-dimensional space derived by applying multidimensional scaling to  
 703 a matrix of the GO terms' semantic similarities. Bubble colour indicated the corrected *P*-values  
 704 (bubbles of more significant terms were blue).

705

706

707

708 **Figures 4.**

709

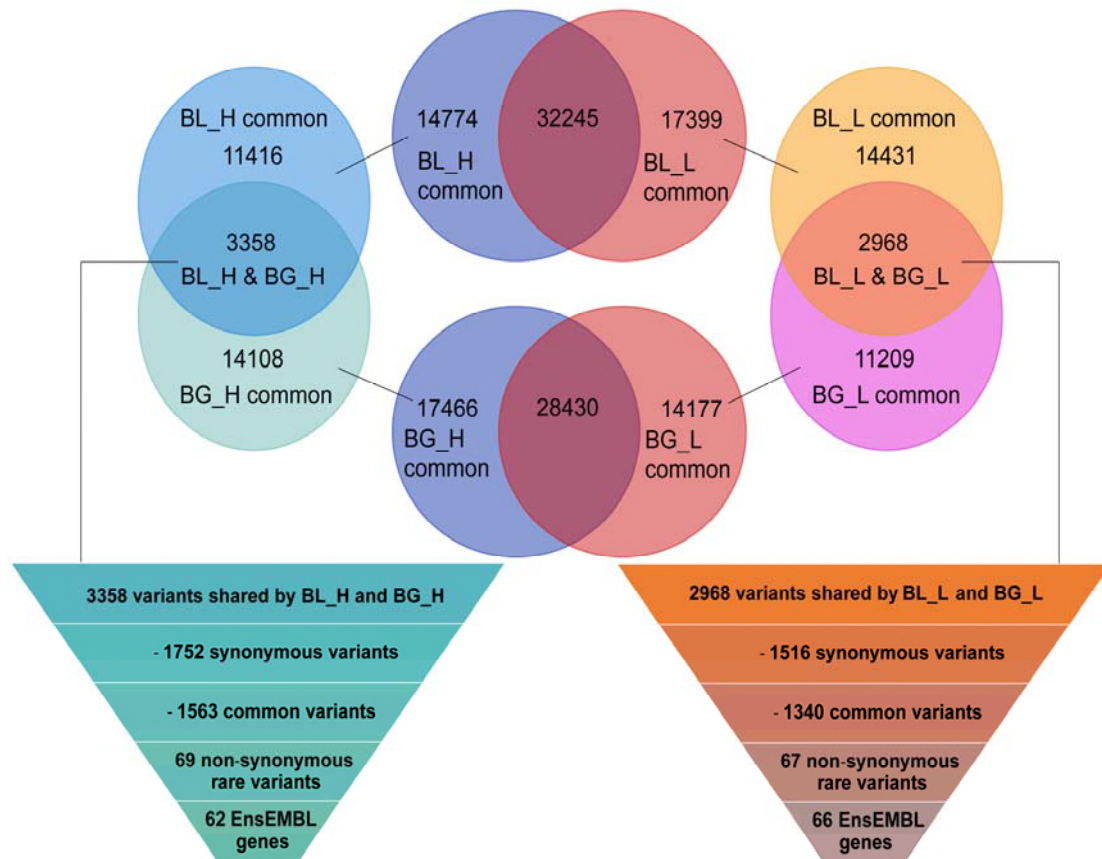

710

711

712 **The step-by-step variant filtering for identification of rare genes associated with higher and**  
713 **lower phenotype in body girth and body length.**

714 To identify shared genetic variants in higher body girth (BG\_H) and higher body length (BL\_H),  
715 we started with 14,774 BL\_H and 17,466 BG\_H unique variants. The 3,358 shared variants were  
716 further filtered and mapped to 62 Ensemble genes. The same filtering pipeline was applied to  
717 lower body girth (BG\_L) and lower body length (BL\_L) and 66 shared genes were obtained.

718



719

720 **Figures 5.**

721

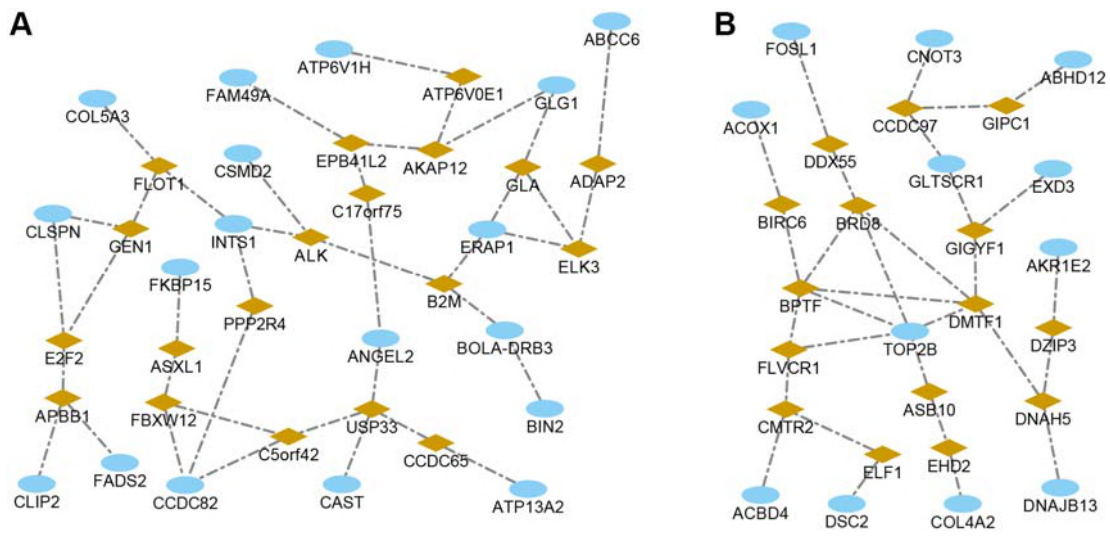

722

723

724 **The respective sub-networks for the genes shared by the higher phenotype groups and the**  
725 **lower phenotype groups of body length and body girth in cattle.**

726 (A) the sub-network extracted from 62 genes shared by higher phenotype value in body girth  
727 group (BG\_H) and body length (BL\_H); (B) the sub-network extracted from 66 genes shared by  
728 lower phenotype value in body girth (BG\_L) and body length (BL\_L). The blue circles were the  
729 genes with rare variants in our data. The orange diamond shapes were the linker genes to connect  
730 those mutated genes for a fully-connected network.

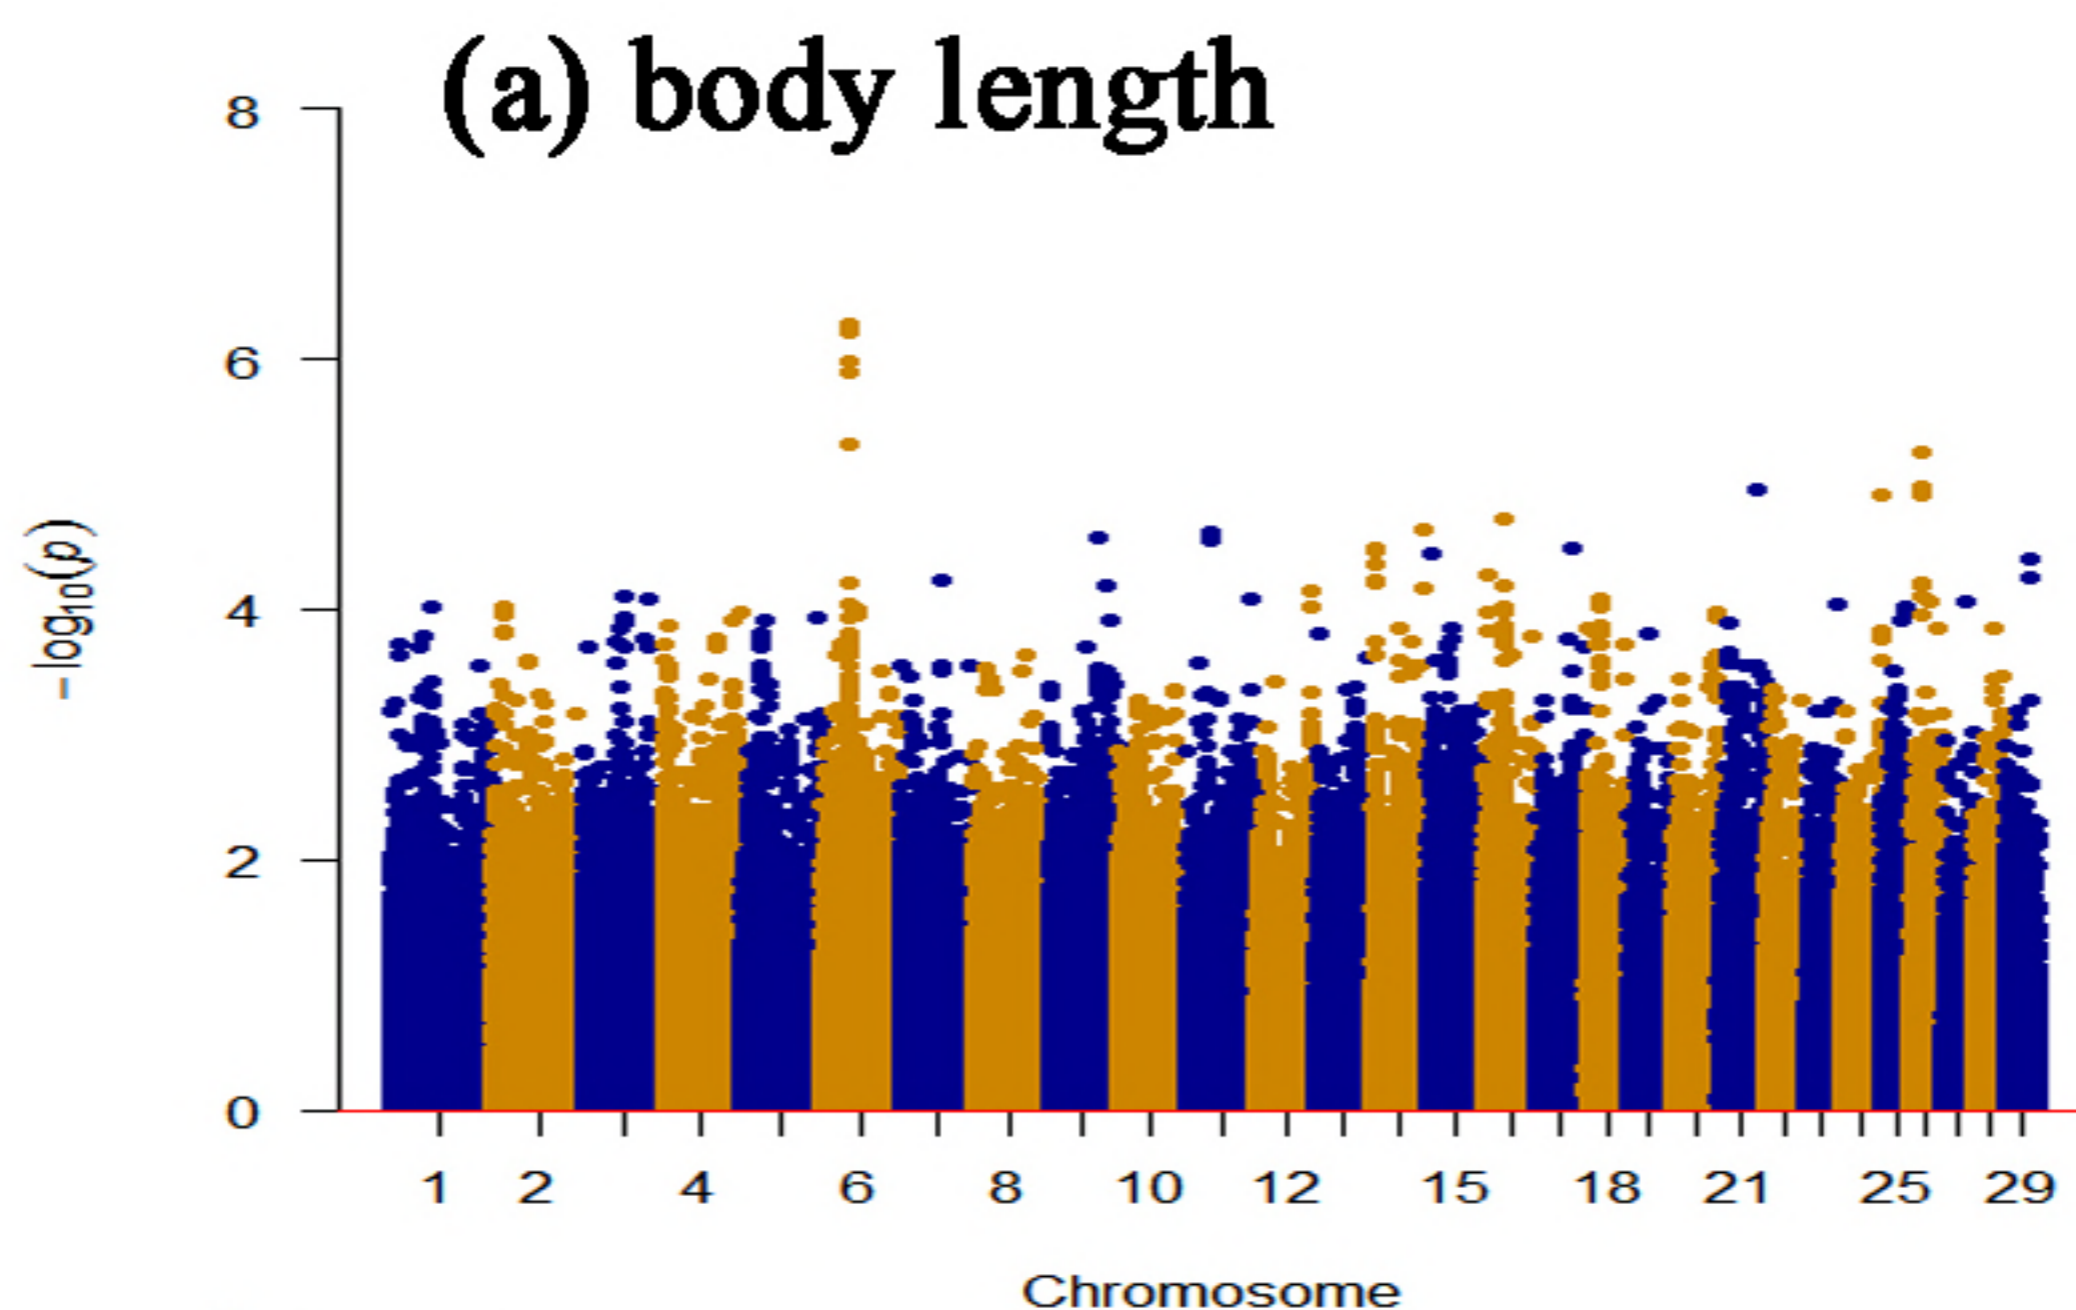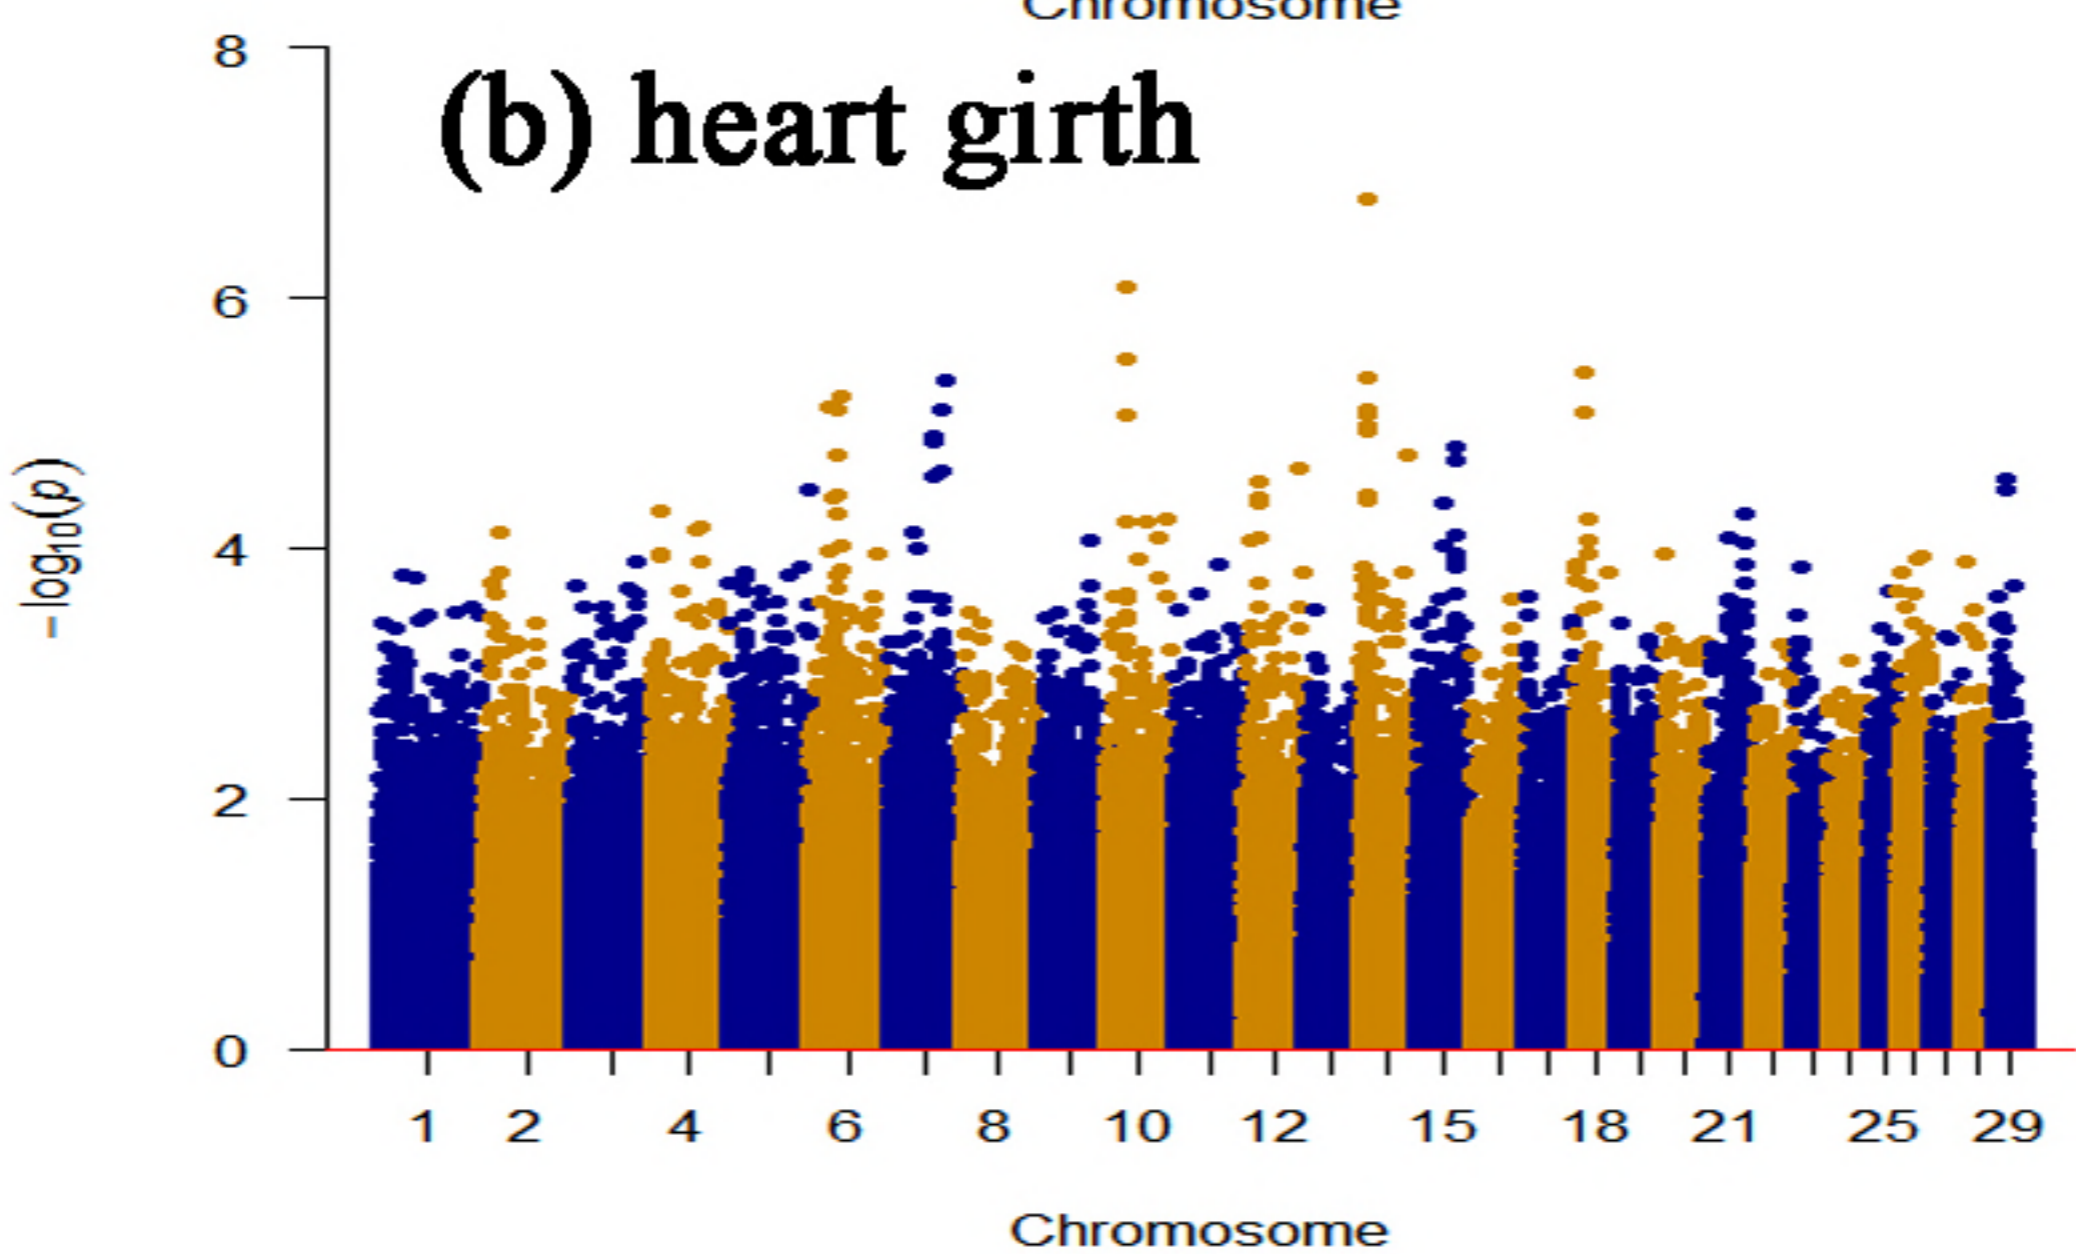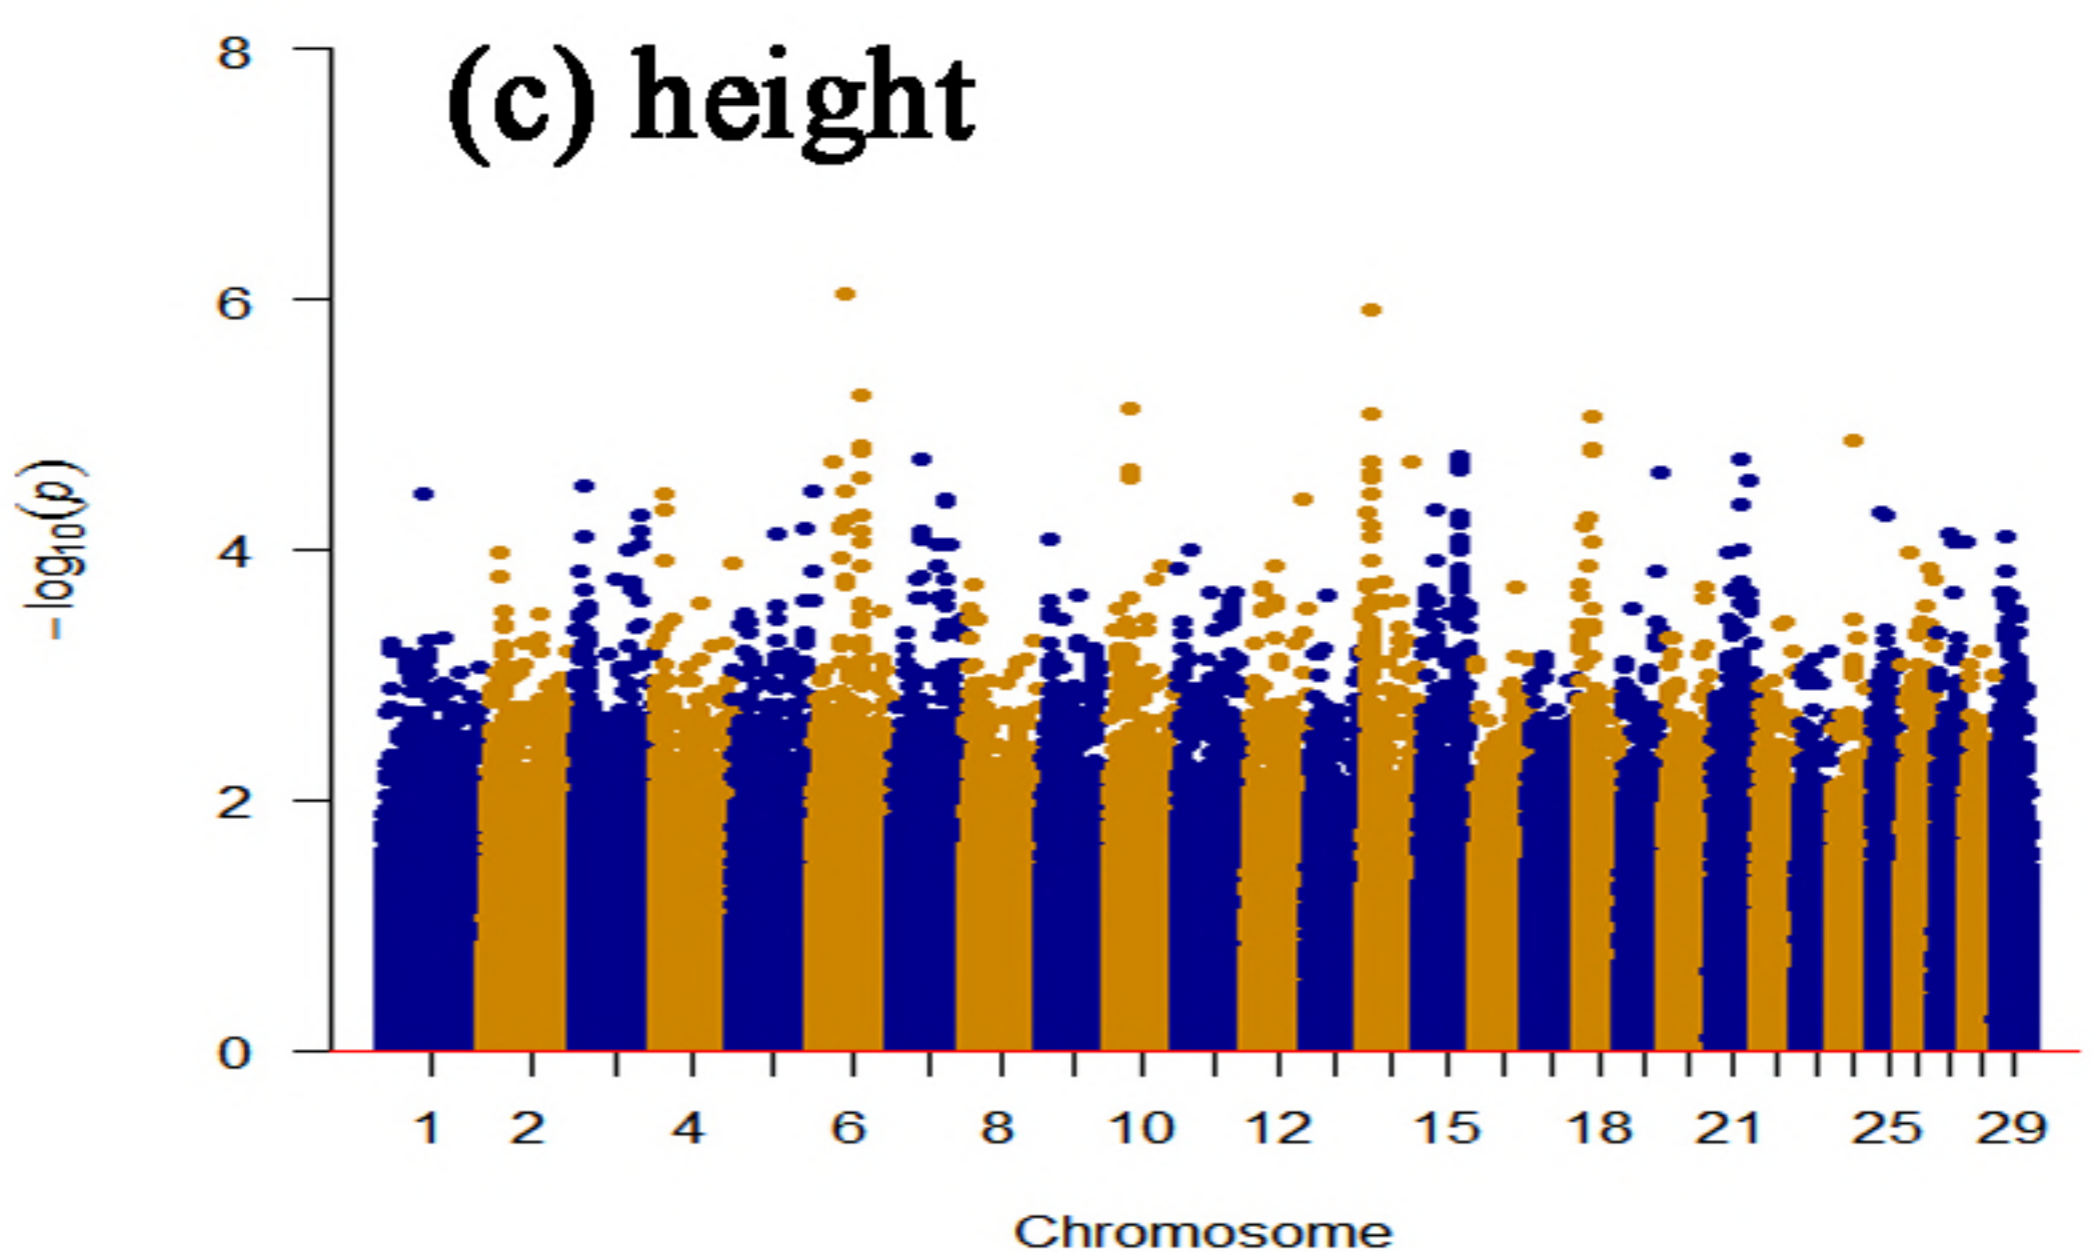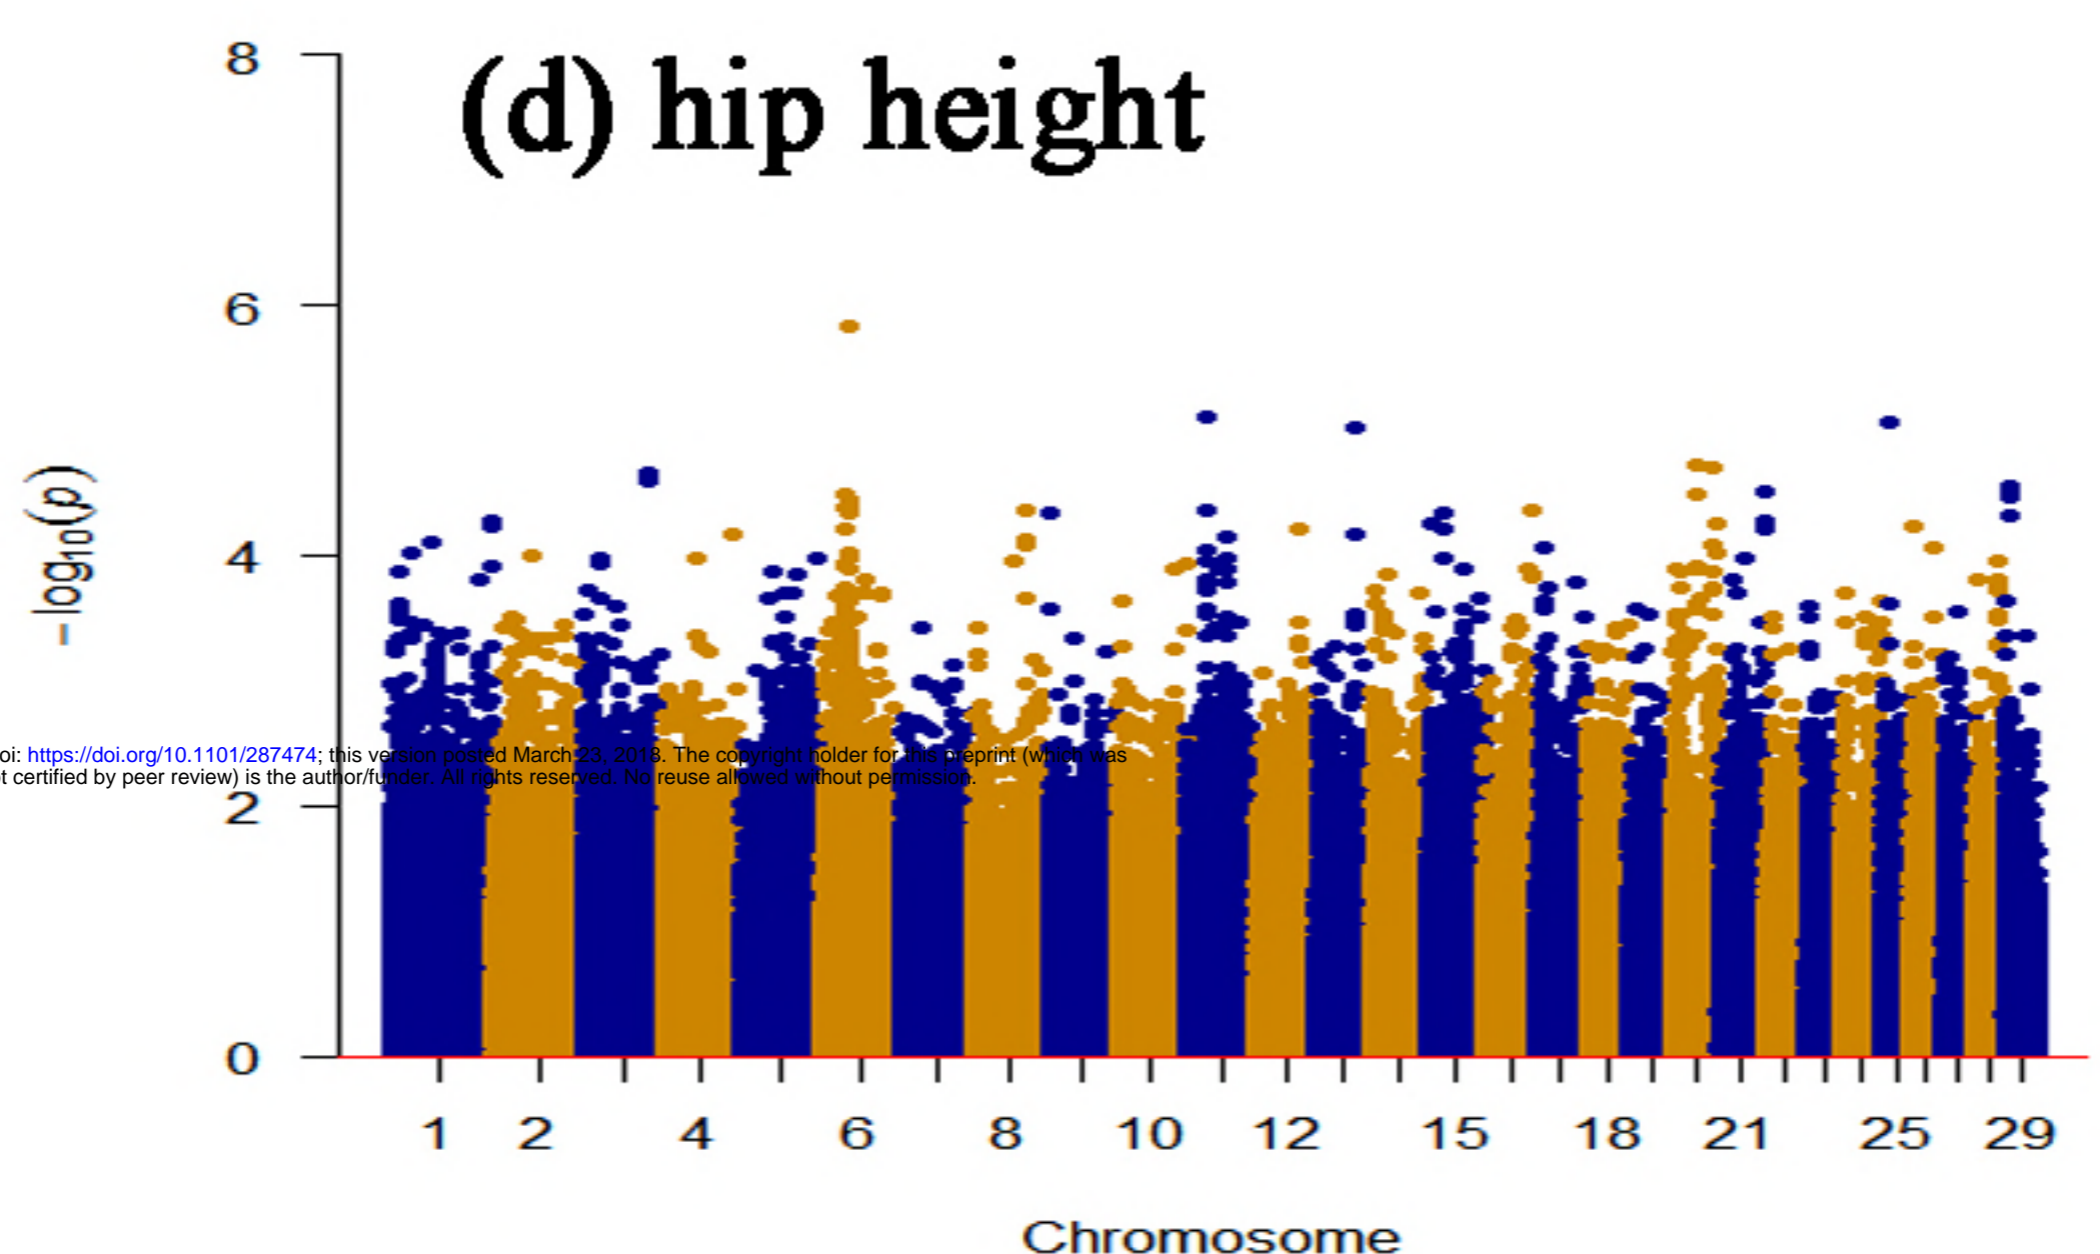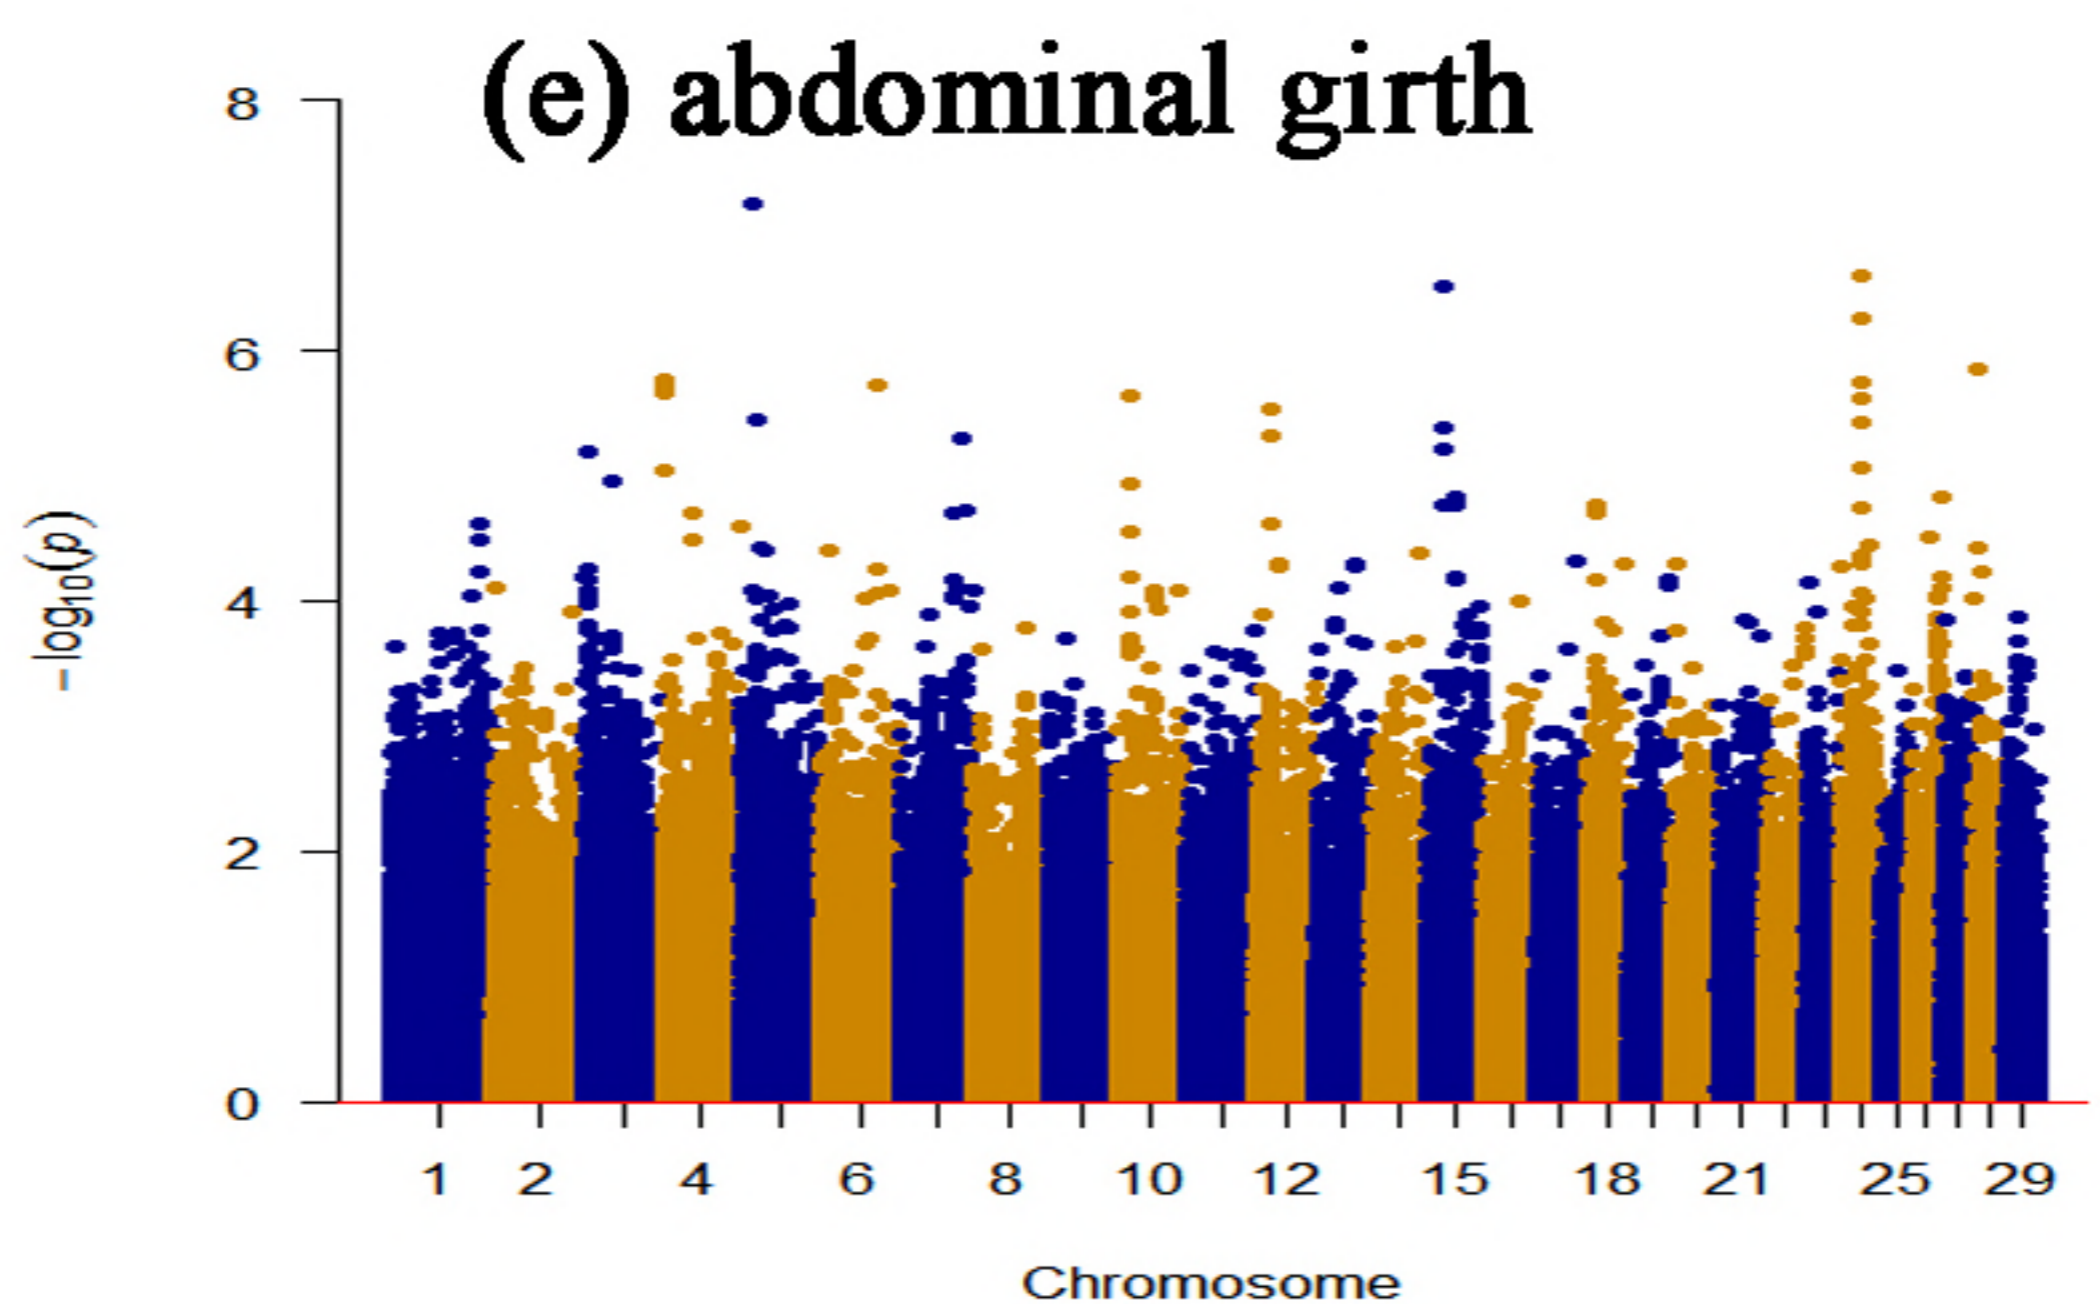

## Whole exome sequencing

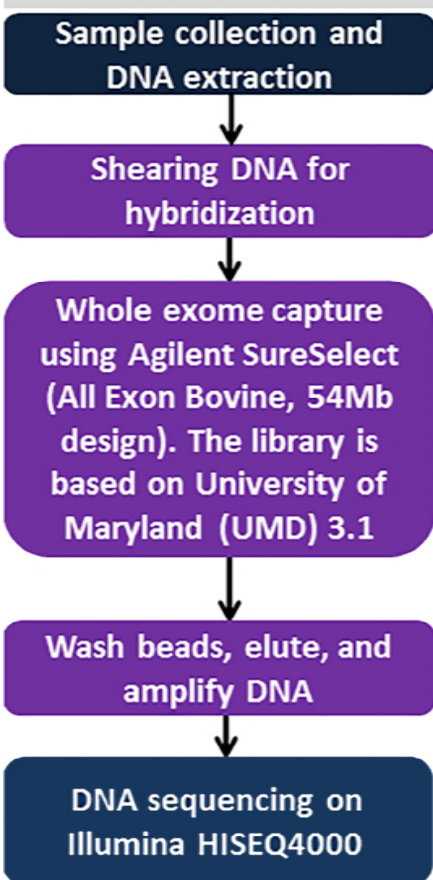

## Sequencing data processing

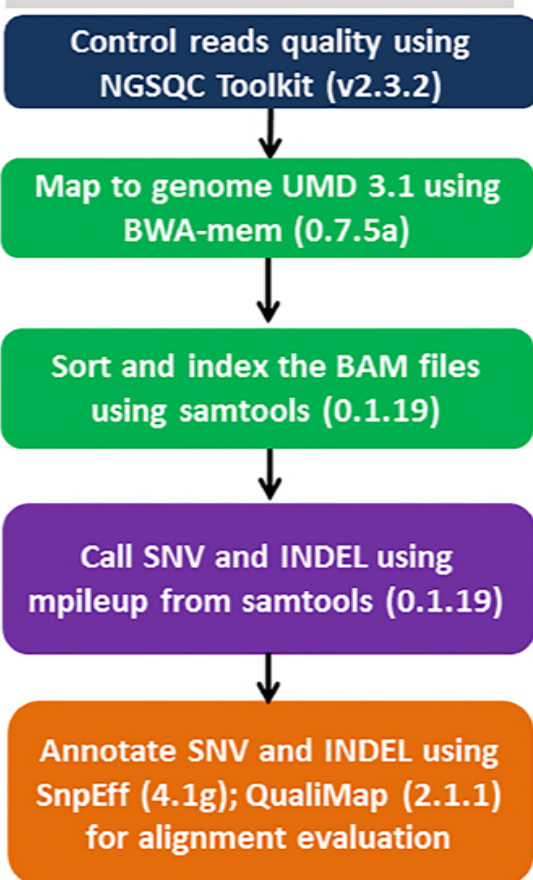

## Integrative analysis

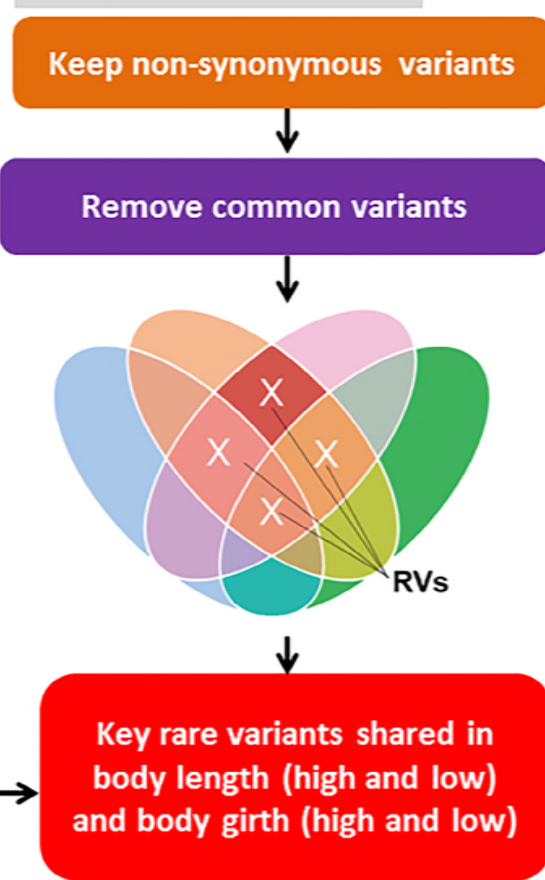

**A**

| Number of variants/genes | BG_H  | BG_L  | BL_H  | BL_L  |
|--------------------------|-------|-------|-------|-------|
| All variants             | 45896 | 42607 | 47019 | 49644 |
| nonsynonymous            | 22788 | 21078 | 23362 | 24558 |
| rare nonsynonymous       | 1158  | 1151  | 1267  | 1303  |
| Ensembl genes            | 299   | 302   | 263   | 283   |

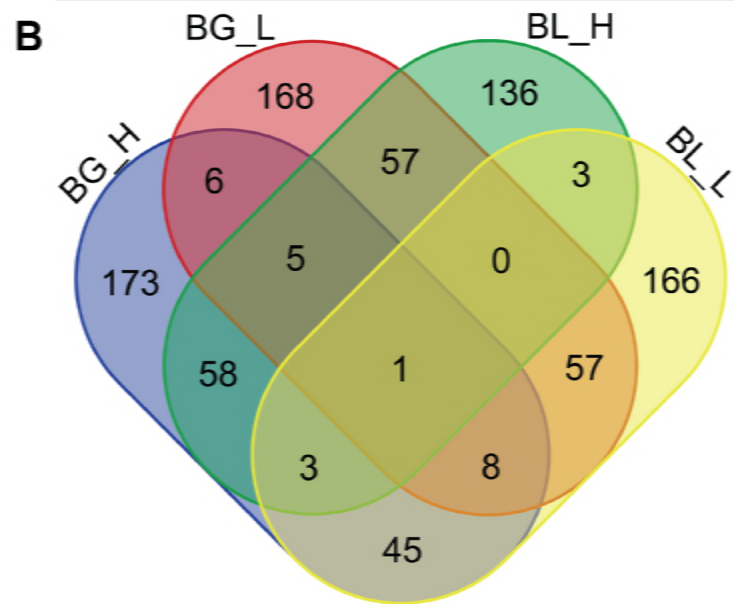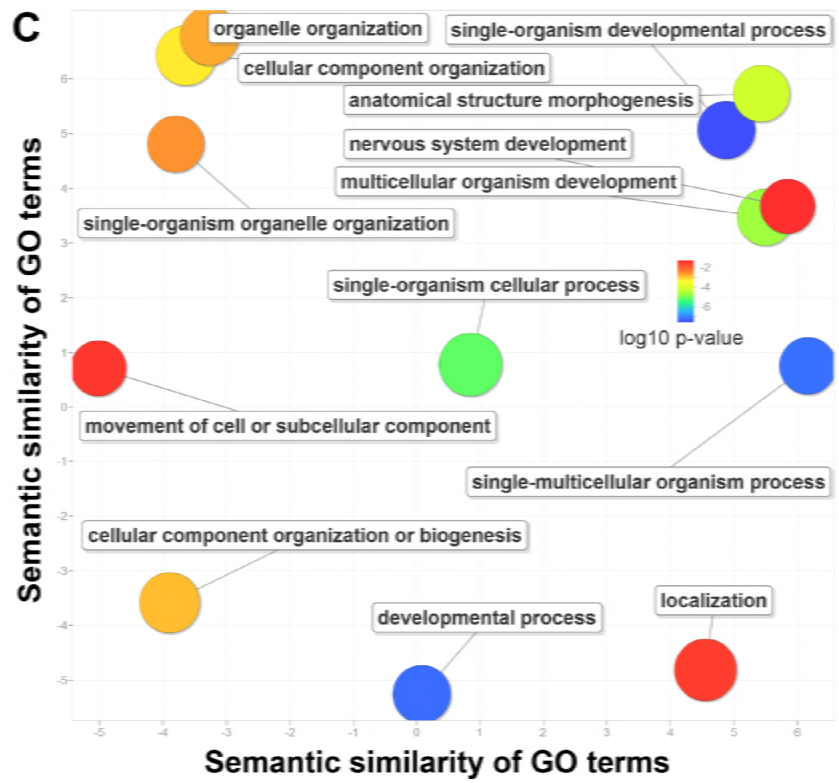

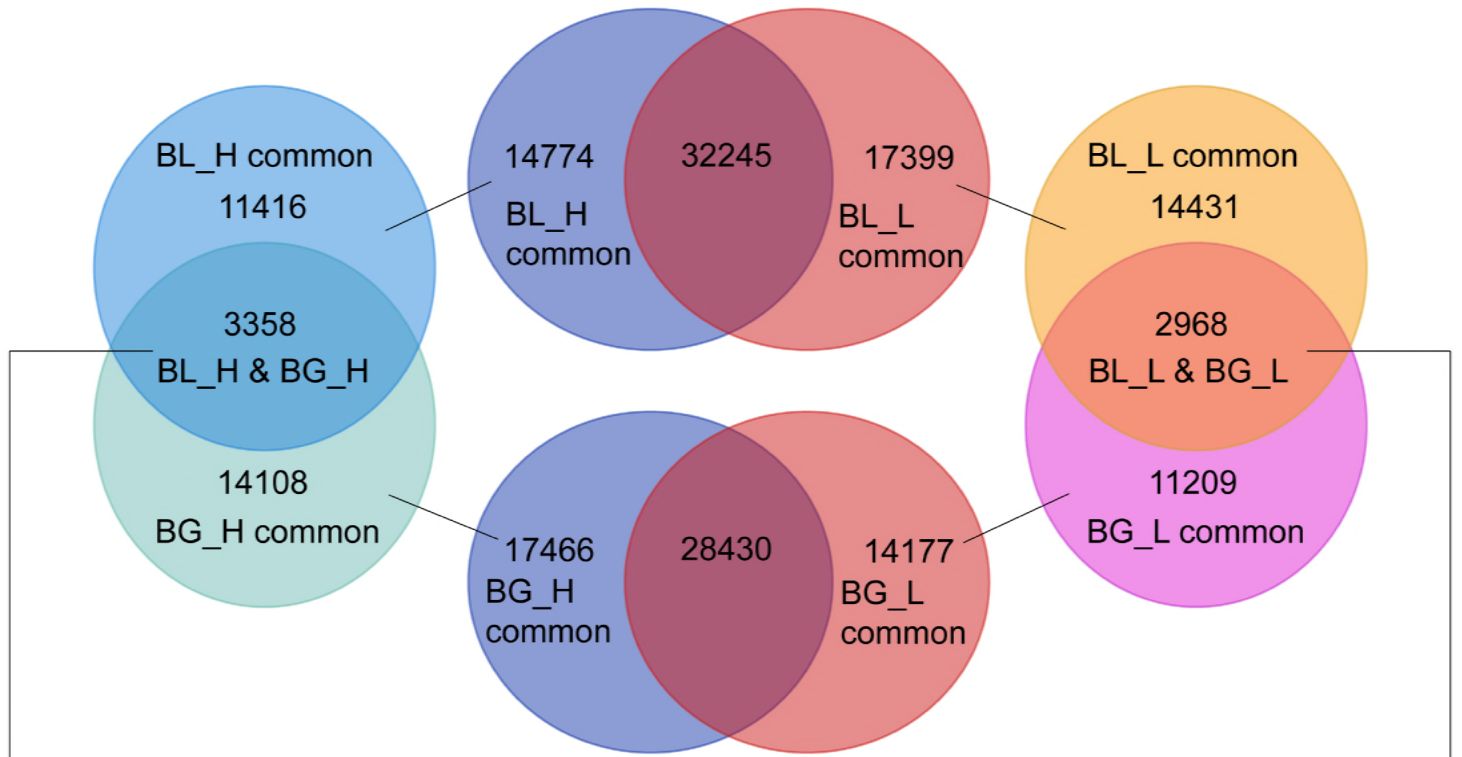

**3358 variants shared by BL\_H and BG\_H**

- 1752 synonymous variants

- 1563 common variants

69 non-synonymous rare variants

62 EnsEMBL genes

**2968 variants shared by BL\_L and BG\_L**

- 1516 synonymous variants

- 1340 common variants

67 non-synonymous rare variants

66 EnsEMBL genes
